# Supplementary material
Source: publisher figshare collection journal article supplement (https://tandf.figshare.com/articles/dataset/_/4982567)
Supplement: Supplementary file 1 [file 1]

1

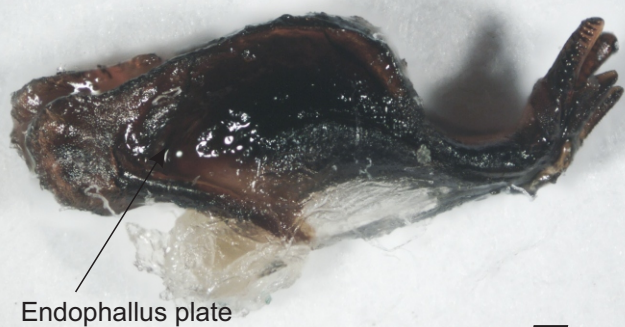

Endophallus plate

2

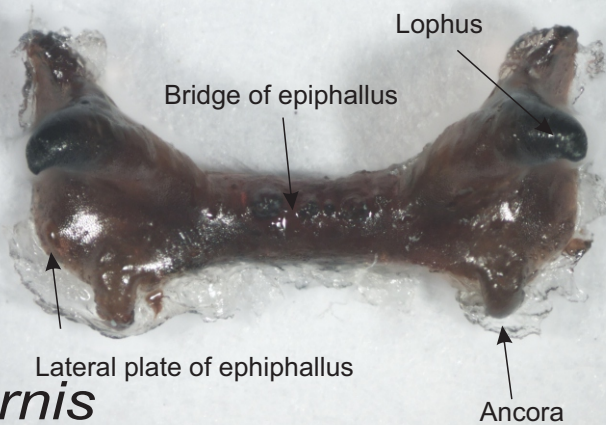

Bridge of epiphallus

Lophus

Lateral plate of epiphallus

Ancora

*T. citricornis*

3

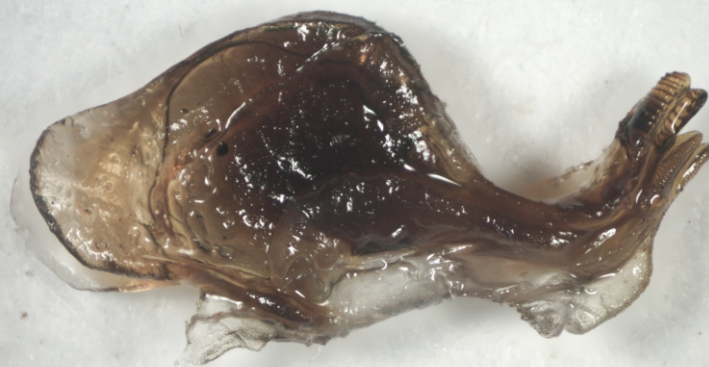

4

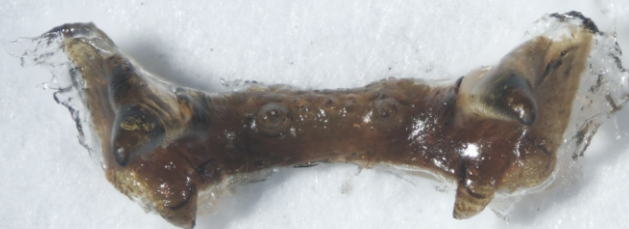*T. gutturosa*

5

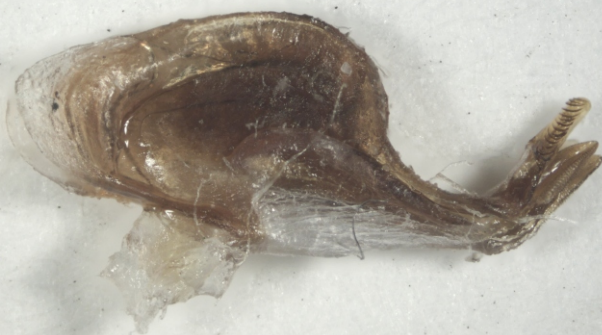

6

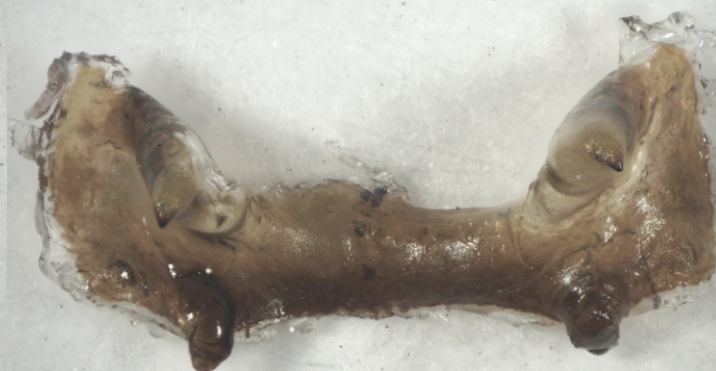*T. varipennis*



7

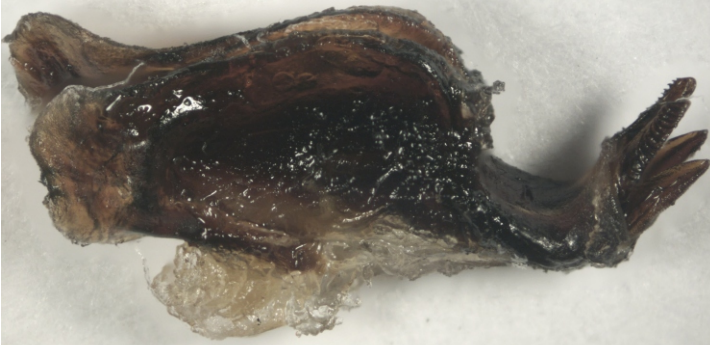

8

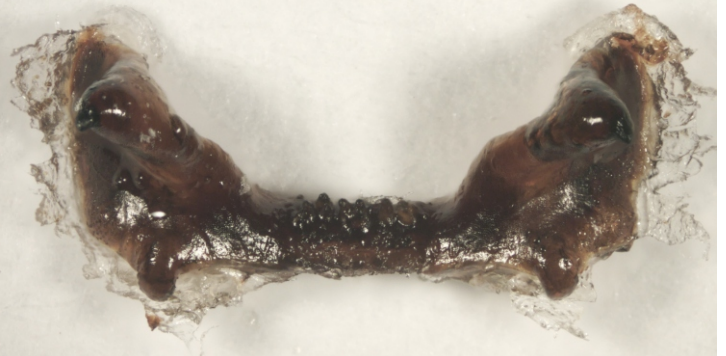

*T. reticulata*

9

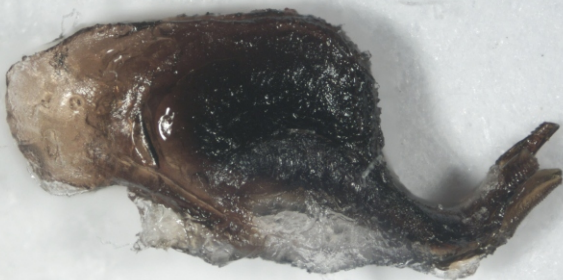

10

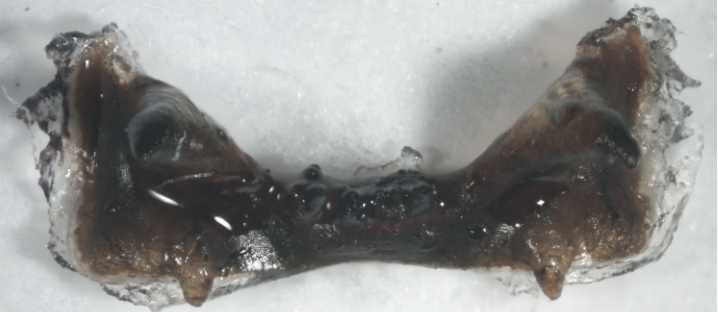

*T. auricornis*

11

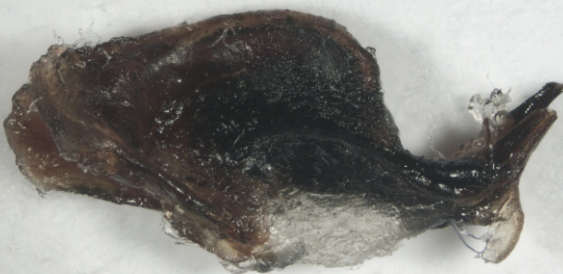

12

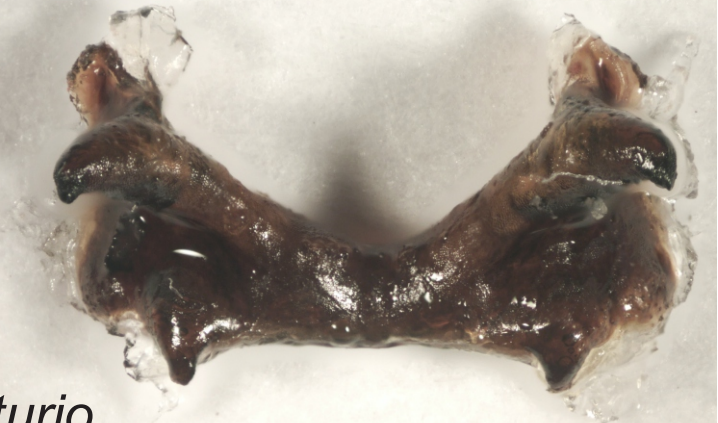

*T. centurio*



13

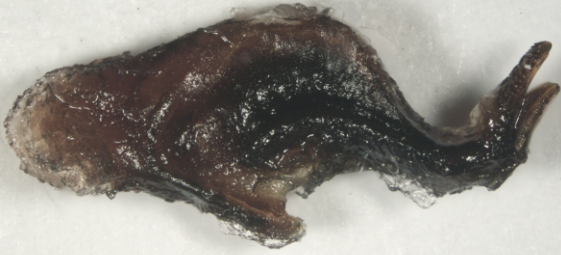

14

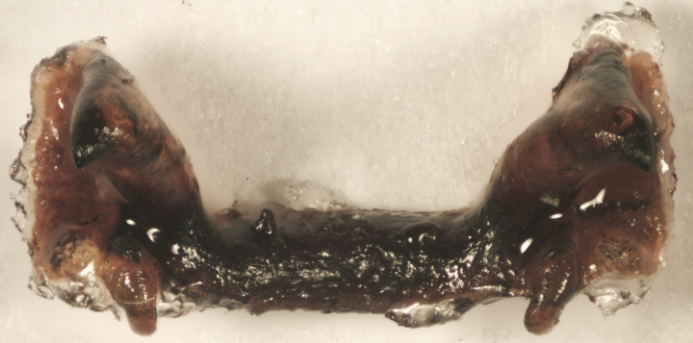

*T. eques*

15

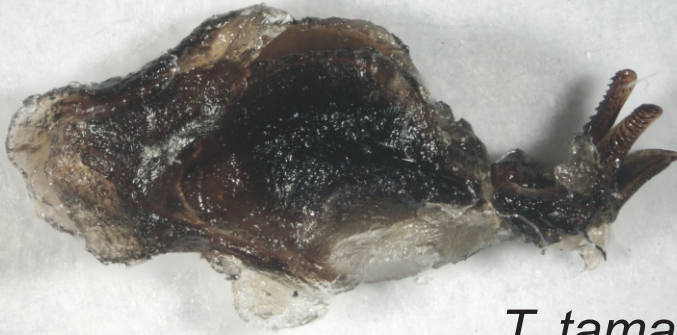

16

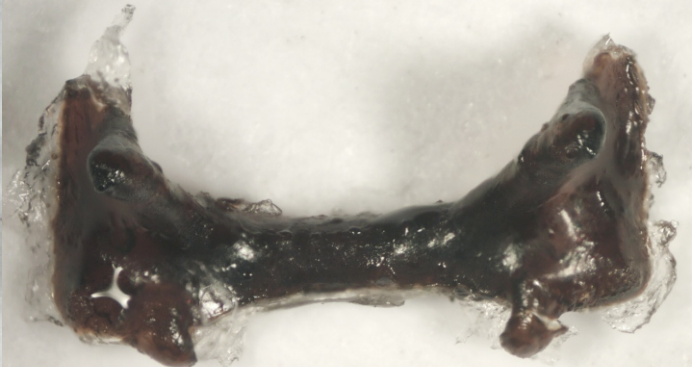

*T. tamaulipensis*

17

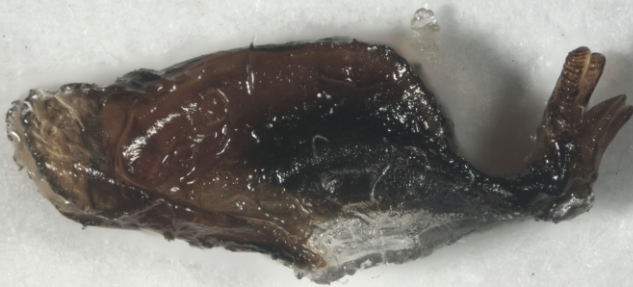

18

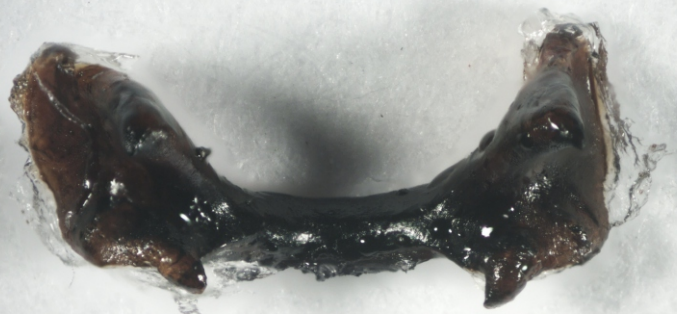

*T. stali*



19

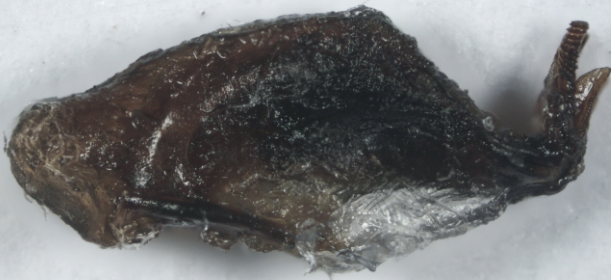

20

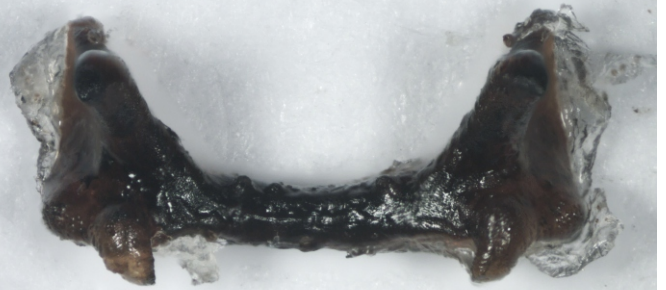

*T. picticornis*

21

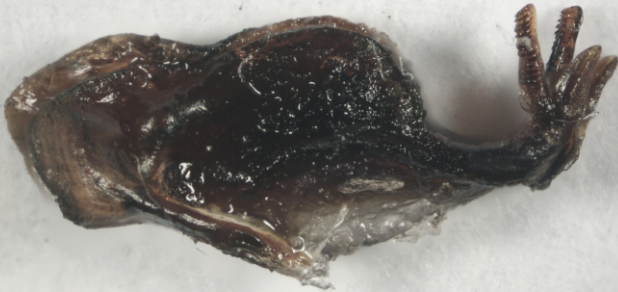

22

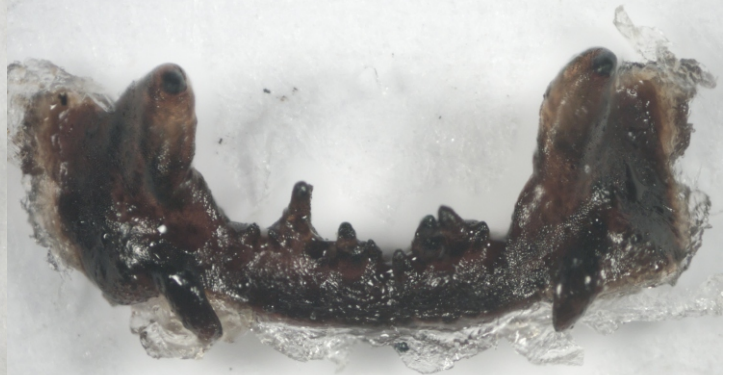

*T. obscura*

23

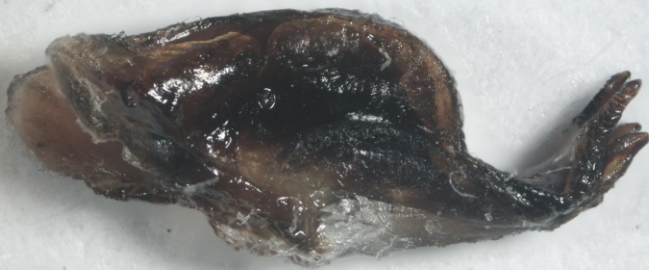

24

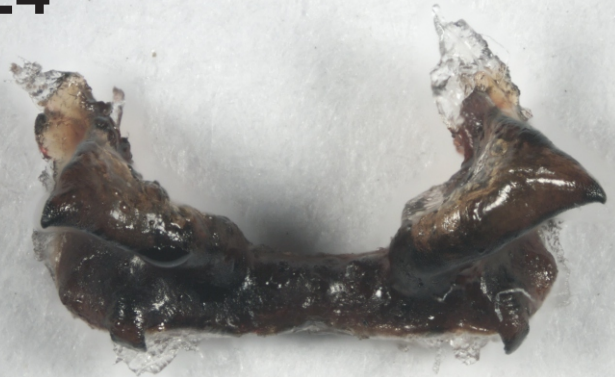

*R. microptera*
