# Supplementary material
Source: publisher figshare collection journal article supplement (https://tandf.figshare.com/articles/dataset/_/4982567)
Supplement: Supplementary file 2 [file 1]

# COI

Introgression or incomplete lineage sorting

numts

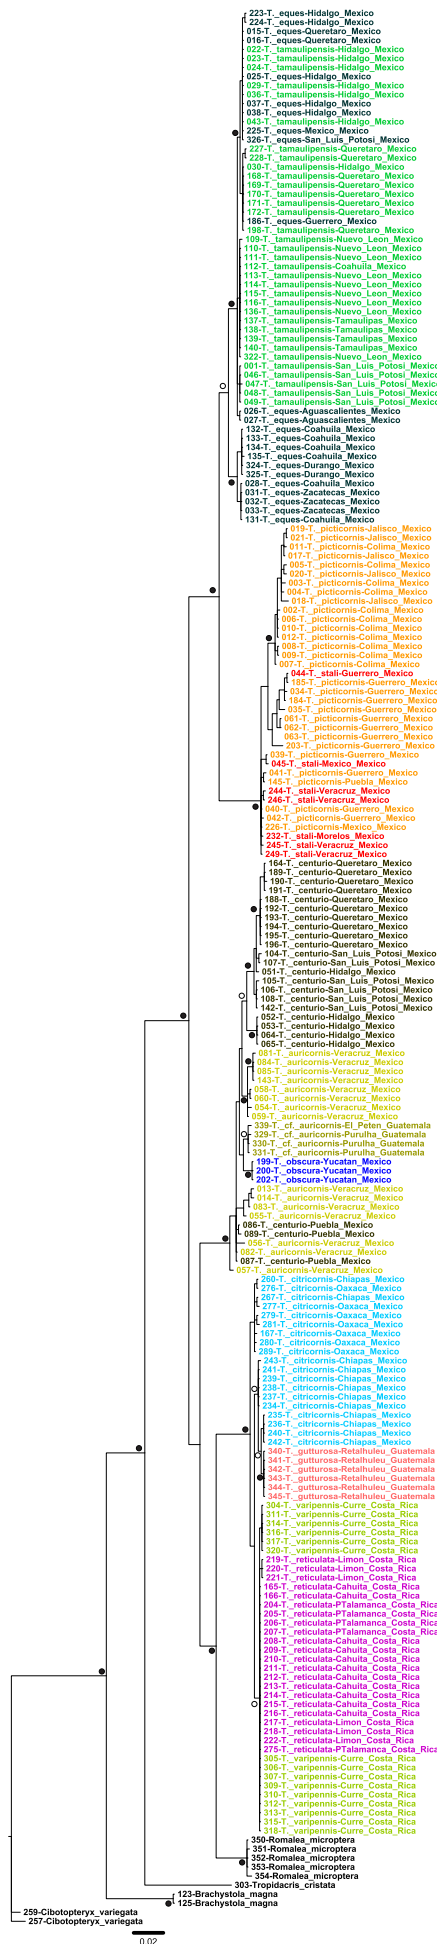

*T. tamaulipensis* + *T. eques*

*T. eques*

*T. picticornis* (A)

*T. picticornis* + *T. stali* (B)

*T. picticornis* + *T. stali* (C)

*T. centurio*

*T. auricornis*

*T. cf. auricornis*

*T. obscura*

*T. citricornis*

*T. gutturosa*

*T. reticulata* + *T. varipennis*

# cyt b

Introgression or incomplete lineage sorting

numts

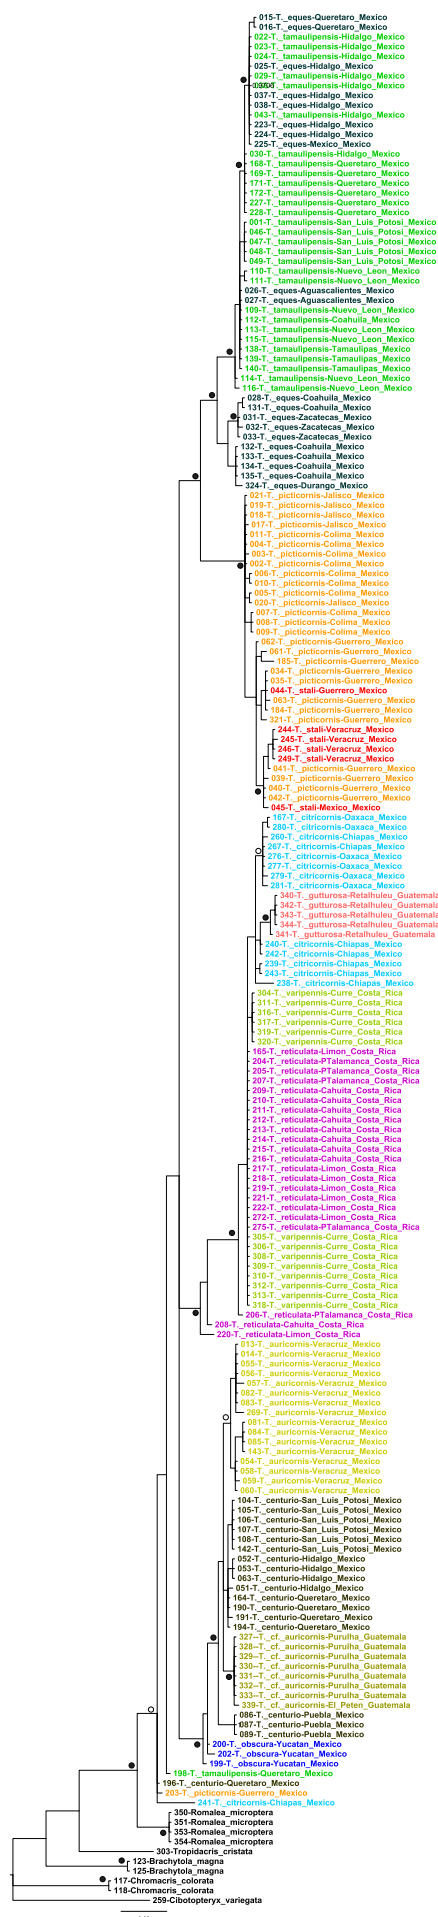

*T. tamaulipensis* + *T. eques*

*T. eques*

*T. picticornis* (A)

*T. picticornis* + *T. stali* (B)

*T. picticornis* + *T. stali* (C)

*T. citricornis* + *T. gutturosa*

*T. reticulata* + *T. varipennis*

*T. auricornis*

*T. centurio*

*T. cf. auricornis*

*T. obscura*

**Supplementary material 6.** Phylograms reconstructed with the Bayesian analyses based on the COI and cyt b mitochondrial markers. Blue squares represent probable introgression or incomplete lineage sorting events; red squares represent potential numts. Black and white circles near branches indicate Bayesian posterior probabilities  $\geq 0.95$  and  $0.90 < 0.95$ , respectively.
