# Supplementary material
Source: publisher figshare collection journal article supplement (https://tandf.figshare.com/articles/dataset/_/4982567)
Supplement: Supplementary file 3 [file 1]

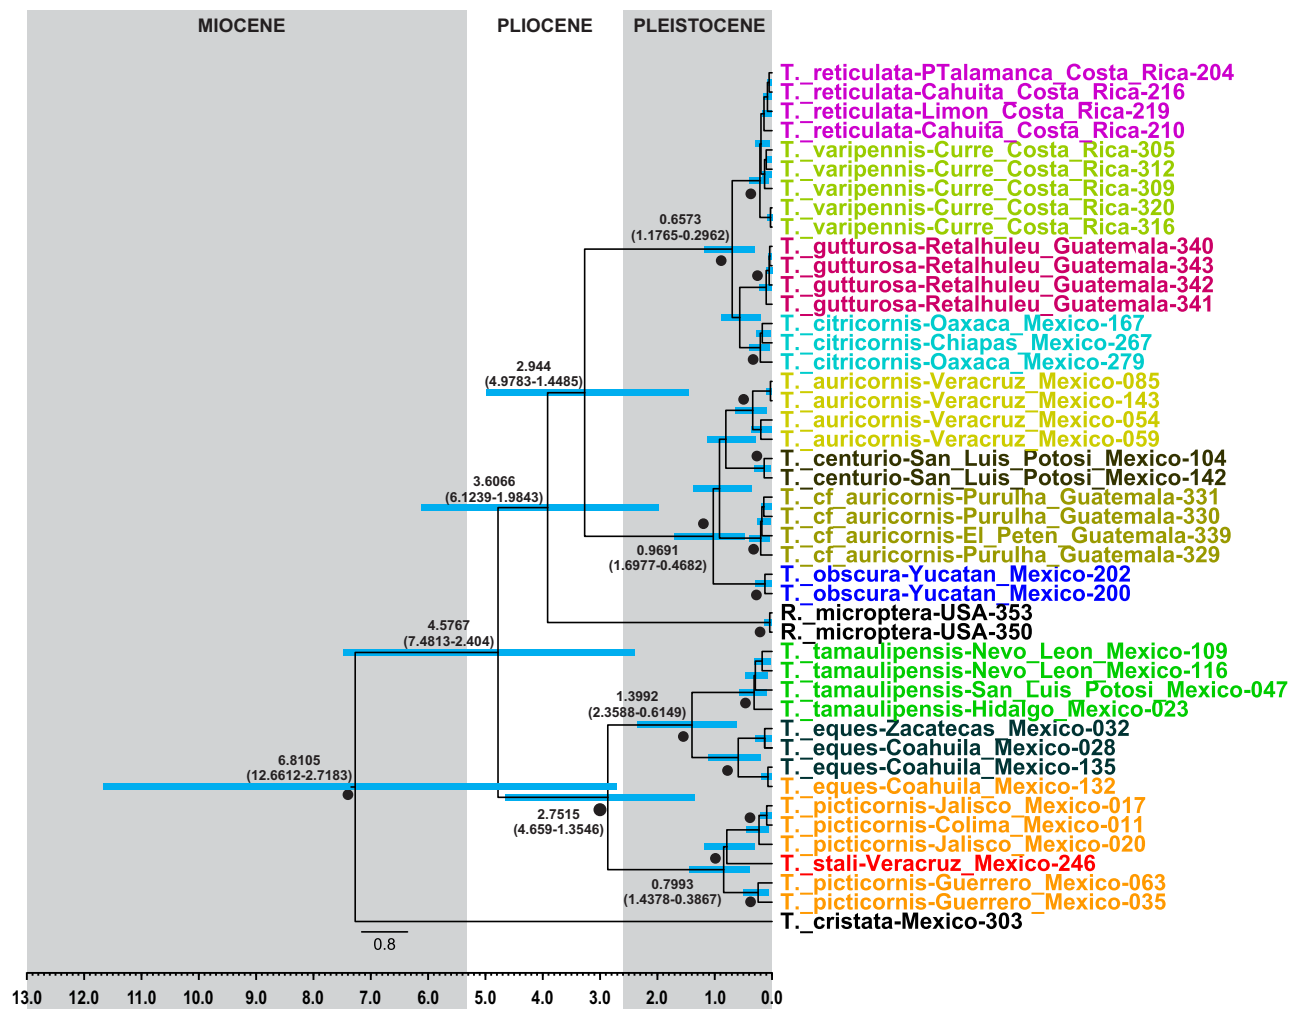

**Supplementary material 10.** Chronogram reconstructed with the program BEAST using the mt concatenated data set. Height 95% HPD million years (My) intervals are shown for selected nodes. Black circles near branches indicate Bayesian posterior probabilities  $\geq 0.95$ .
