# Supplementary material
Source: publisher figshare collection journal article supplement (https://tandf.figshare.com/articles/dataset/_/4982567)
Supplement: Supplementary file 4 [file 1]

**Supplementary Material 1.** List of the specimens included in this study, their localities and DNA voucher and GeneBank accession numbers for the four markers examined.

| Voucher no. | Species                         | Locality                                                            | Latitude N | Longitude W | Collection date  | COI      | cyt b    | 28S      | H3       |
|-------------|---------------------------------|---------------------------------------------------------------------|------------|-------------|------------------|----------|----------|----------|----------|
| 001TtaSLP   | <i>Taeniopoda tamaulipensis</i> | México: San Luis Potosí: Guadalcázar: Abrego, Campamento Monternach | 22.6564    | -100.3801   | 22-IX-2012       | KY864484 | KY864680 | -        | -        |
| 002TpiCol   | <i>Taeniopoda picticornis</i>   | México: Colima: Coquimatlán: Arroyo El Tanque del General           | 19.1417    | -104.0242   | 25, 26-VIII-2013 | KY864485 | KY864681 | -        | -        |
| 003TpiCol   | <i>Taeniopoda picticornis</i>   | México: Colima: Coquimatlán: Arroyo El Tanque del General           | 19.1417    | -104.0242   | 25, 26-VIII-2013 | KY864486 | KY864682 | -        | -        |
| 004TpiCol   | <i>Taeniopoda picticornis</i>   | México: Colima: Coquimatlán: Arroyo El Tanque del General           | 19.1417    | -104.0242   | 25, 26-VIII-2013 | KY864487 | KY864683 | -        | -        |
| 005TpiCol   | <i>Taeniopoda picticornis</i>   | México: Colima: Coquimatlán: Arroyo El Tanque del General           | 19.1417    | -104.0242   | 25, 26-VIII-2013 | KY864488 | KY864684 | -        | -        |
| 006TpiCol   | <i>Taeniopoda picticornis</i>   | México: Colima: Coquimatlán: Arroyo El Tanque del General           | 19.1417    | -104.0242   | 25, 26-VIII-2013 | KY864489 | KY864685 | -        | KY864851 |
| 007TpiCol   | <i>Taeniopoda picticornis</i>   | México: Colima: Coquimatlán: Arroyo El Tanque del General           | 19.1417    | -104.0242   | 25, 26-VIII-2013 | KY864490 | KY864686 | -        | -        |
| 008TpiCol   | <i>Taeniopoda picticornis</i>   | México: Colima: Coquimatlán: Arroyo El Tanque del General           | 19.1417    | -104.0242   | 25, 26-VIII-2013 | KY864491 | KY864687 | -        | -        |
| 009TpiCol   | <i>Taeniopoda picticornis</i>   | México: Colima: Coquimatlán: Arroyo El Tanque del General           | 19.1417    | -104.0242   | 25, 26-VIII-2013 | KY864492 | KY864688 | -        | KY864852 |
| 010TpiCol   | <i>Taeniopoda picticornis</i>   | México: Colima: Coquimatlán: Arroyo El Tanque del General           | 19.1417    | -104.0242   | 25, 26-VIII-2013 | KY864493 | KY864689 | -        | -        |
| 011TpiCol   | <i>Taeniopoda picticornis</i>   | México: Colima: Coquimatlán: Arroyo El Tanque del General           | 19.1417    | -104.0242   | 25, 26-VIII-2013 | KY864494 | KY864690 | KY864403 | KY864853 |
| 012TpiCol   | <i>Taeniopoda picticornis</i>   | México: Colima: Coquimatlán: Arroyo El Tanque del General           | 19.1417    | -104.0242   | 25, 26-VIII-2013 | KY864495 | -        | -        | -        |
| 013TauVer   | <i>Taeniopoda auricornis</i>    | México: Veracruz: Xico: Cascada de Texolo                           | 19.4063    | -96.9919    | 13-IX-2013       | KY864450 | KY864691 | -        | -        |
| 014TauVer   | <i>Taeniopoda auricornis</i>    | México: Veracruz: Xico: Cascada de Texolo                           | 19.4063    | -96.9919    | 13-IX-2013       | KY864451 | KY864692 | -        | -        |
| 015TeqQro   | <i>Taeniopoda eques</i>         | México: Querétaro: Cadereyta                                        | 20.7027    | -99.7836    | 11-X-2009        | KY864462 | KY864670 | -        | KY864854 |
| 016TeqQro   | <i>Taeniopoda eques</i>         | México: Querétaro: Cadereyta: Bellavista del Río                    | 20.685     | -99.577     | 11-X-2009        | KY864463 | KY864671 | -        | -        |
| 017TpiJal   | <i>Taeniopoda picticornis</i>   | México: Jalisco: La Huerta, Estación de Biología de Chamela         | 19.4937    | -104.9542   | 6-IX-2009        | KY864496 | KY864693 | KY864404 | KY864855 |
| 018TpiJal   | <i>Taeniopoda picticornis</i>   | México: Jalisco: La Huerta, Estación de Biología de Chamela         | 19.4937    | -104.9542   | 6-IX-2009        | KY864497 | KY864694 | -        | -        |
| 019TpiJal   | <i>Taeniopoda picticornis</i>   | México: Jalisco: La Huerta, Estación de Biología de Chamela         | 19.4937    | -104.9542   | 6-IX-2009        | KY864498 | KY864695 | -        | -        |

|           |                                 |                                                                     |         |           |            |          |          |          |          |
|-----------|---------------------------------|---------------------------------------------------------------------|---------|-----------|------------|----------|----------|----------|----------|
| 020TpiJal | <i>Taeniopoda picticornis</i>   | México: Jalisco: La Huerta, Estación de Biología de Chamela         | 19.4937 | -104.9542 | 6-IX-2009  | KY864499 | KY864696 | KY864405 | KY864856 |
| 021TpiJal | <i>Taeniopoda picticornis</i>   | México: Jalisco: La Huerta, Estación de Biología de Chamela         | 19.4937 | -104.9542 | 6-IX-2009  | KY864500 | KY864697 | -        | -        |
| 022TtaHgo | <i>Taeniopoda tamaulipensis</i> | México: Hidalgo: Xhita                                              | 20.6345 | -99.3265  | 10-X-2009  | KY864501 | KY864698 | -        | -        |
| 023TtaHgo | <i>Taeniopoda tamaulipensis</i> | México: Hidalgo: Xhita                                              | 20.6345 | -99.3265  | 10-X-2009  | KY864502 | KY864699 | KY864406 | KY864857 |
| 024TtaHgo | <i>Taeniopoda tamaulipensis</i> | México: Hidalgo: El tablón                                          | -       | -         | 11-X-2009  | KY864503 | KY864700 | -        | -        |
| 025TeqHgo | <i>Taeniopoda eques</i>         | México: Hidalgo: El tablón                                          | -       | -         | 11-X-2009  | KY864464 | KY864672 | -        | -        |
| 026TeqAgs | <i>Taeniopoda eques</i>         | México: Aguascalientes: San José de García-Paredes                  | 20.143  | -102.3817 | 23-IX-2010 | KY864470 | KY864678 | -        | -        |
| 027TeqAgs | <i>Taeniopoda eques</i>         | México: Aguascalientes: San José de García-Paredes                  | 20.143  | -102.3817 | 23-IX-2010 | KY864471 | KY864679 | -        | -        |
| 028TeqCoa | <i>Taeniopoda eques</i>         | México: Coahuila: La angostura Saltillo                             | 25.3607 | -101.0226 | 22-IX-2010 | KY864504 | KY864701 | KY864407 | KY864858 |
| 029TtaHgo | <i>Taeniopoda tamaulipensis</i> | México: Hidalgo: Pedregal                                           | 20.6516 | -98.8063  | 12-IX-2012 | KY864505 | KY864702 | -        | KY864859 |
| 030TtaHgo | <i>Taeniopoda tamaulipensis</i> | México: Hidalgo: Metznoxtla                                         | 20.6299 | -98.8578  | 12-IX-2012 | KY864506 | KY864703 | -        | KY864860 |
| 031TeqZac | <i>Taeniopoda eques</i>         | México: Zacatecas: Sierra Vieja                                     | 23.4947 | -102.1285 | 22-IX-2010 | KY864507 | KY864704 | -        | -        |
| 032TeqZac | <i>Taeniopoda eques</i>         | México: Zacatecas: Sierra Vieja                                     | 23.4947 | -102.1285 | 22-IX-2010 | KY864508 | KY864705 | KY864408 | KY864861 |
| 033TeqZac | <i>Taeniopoda eques</i>         | México: Zacatecas: Sierra Vieja                                     | 23.4947 | 102.1285  | 22-IX-2010 | KY864509 | KY864706 | -        | -        |
| 034TpiGue | <i>Taeniopoda picticornis</i>   | México: Guerrero: Carretera Teleolapan-Iguala                       | 18.4337 | -99.7544  | -          | KY864510 | KY864707 | -        | -        |
| 035TpiGue | <i>Taeniopoda picticornis</i>   | México: Guerrero: Carretera Teleolapan-Iguala                       | 18.4337 | -99.7544  | -          | KY864511 | KY864708 | KY864409 | KY864862 |
| 036TtaHgo | <i>Taeniopoda tamaulipensis</i> | México: Hidalgo: Xhita                                              | 20.6345 | -99.3265  | 10-X-2009  | KY864512 | KY864709 | -        | KY864863 |
| 037TeqHgo | <i>Taeniopoda eques</i>         | México: Hidalgo: Xhita                                              | 20.6345 | -99.3265  | 10-X-2009  | KY864465 | KY864673 | -        | -        |
| 038TeqHgo | <i>Taeniopoda eques</i>         | México: Hidalgo: Xhita                                              | 20.6345 | -99.3265  | 10-X-2009  | KY864466 | KY864674 | -        | -        |
| 039TpiGue | <i>Taeniopoda picticornis</i>   | México: Guerrero: Olinalá: Xixila                                   | 18.0019 | -98.8365  | 11-IX-2013 | KY864513 | KY864710 | -        | -        |
| 040TpiGue | <i>Taeniopoda picticornis</i>   | México: Guerrero: Olinalá: Xixila                                   | 18.0019 | -98.8365  | 11-IX-2013 | KY864514 | KY864711 | -        | -        |
| 041TpiGue | <i>Taeniopoda picticornis</i>   | México: Guerrero: Olinalá: Xixila                                   | 18.0019 | -98.8365  | 11-IX-2013 | KY864515 | KY864712 | -        | KY864864 |
| 042TpiGue | <i>Taeniopoda picticornis</i>   | México: Guerrero: Olinalá: Xixila                                   | 18.0019 | -98.8365  | 11-IX-2013 | KY864516 | KY864713 | -        | KY864865 |
| 043TtaHgo | <i>Taeniopoda tamaulipensis</i> | México: Hidalgo: Venados                                            | 20.4754 | -98.6569  | 11-IX-2012 | KY864517 | KY864714 | -        | -        |
| 044TstGue | <i>Taeniopoda stali</i>         | México: Guerrero: Teleolapan                                        | 18.3669 | -99.8689  | 03-XI-2012 | KY864518 | KY864715 | -        | KY864866 |
| 045TstMex | <i>Taeniopoda stali</i>         | México: Estado de México México: Ixtapaluca                         | 19.3145 | -98.8845  | XI-2012    | KY864519 | KY864716 | -        | -        |
| 046TtaSLP | <i>Taeniopoda tamaulipensis</i> | México: San Luis Potosí: Guadalcázar: Abrego, Campamento Monternach | 22.6564 | -100.3801 | -          | KY864520 | KY864717 | -        | -        |
| 047TtaSLP | <i>Taeniopoda tamaulipensis</i> | México: San Luis Potosí: Guadalcázar: Abrego, Campamento Monternach | 22.6564 | -100.3801 | -          | KY864521 | KY864718 | KY864410 | KY864867 |
| 048TtaSLP | <i>Taeniopoda tamaulipensis</i> | México: San Luis Potosí: Guadalcázar: Abrego, Campamento Monternach | 22.6564 | -100.3801 | -          | KY864522 | KY864719 | -        | -        |

|           |                                 |                                                                     |         |           |            |          |          |          |          |
|-----------|---------------------------------|---------------------------------------------------------------------|---------|-----------|------------|----------|----------|----------|----------|
| 049TtaSLP | <i>Taeniopoda tamaulipensis</i> | México: San Luis Potosí: Guadalcázar: Abrego, Campamento Monternach | 22.6564 | -100.3801 | -          | KY864523 | KY864720 | -        | -        |
| 051TceHgo | <i>Taeniopoda centurio</i>      | México: Hidalgo: Molango                                            | 20.7364 | -98.7173  | 11-IX-2012 | KY864524 | KY864721 | -        | -        |
| 052TceHgo | <i>Taeniopoda centurio</i>      | México: Hidalgo: Molango                                            | 20.7364 | -98.7173  | 11-IX-2012 | KY864446 | KY864722 | KY864411 | KY864868 |
| 053TceHgo | <i>Taeniopoda centurio</i>      | México: Hidalgo: Molango                                            | 20.7364 | -98.7173  | 11-IX-2012 | KY864447 | KY864723 | -        | -        |
| 054TauVer | <i>Taeniopoda auricornis</i>    | México: Veracruz: Hotel                                             | 18.9072 | -97.0118  | -          | KY864525 | KY864724 | KY864412 | KY864869 |
| 055TauVer | <i>Taeniopoda auricornis</i>    | México: Veracruz: Hotel                                             | 18.9072 | -97.0118  | -          | KY864453 | KY864725 | -        | -        |
| 056TauVer | <i>Taeniopoda auricornis</i>    | México: Veracruz: Hotel                                             | 18.9072 | -97.0118  | -          | KY864456 | KY864726 | -        | -        |
| 057TauVer | <i>Taeniopoda auricornis</i>    | México: Veracruz: Hotel                                             | 18.9072 | -97.0118  | -          | KY864459 | KY864727 | -        | -        |
| 058TauVer | <i>Taeniopoda auricornis</i>    | México: Veracruz: Barranca de San Miguel                            | 18.8847 | -97.0019  | 10-XI-2011 | KY864526 | KY864728 | -        | -        |
| 059TauVer | <i>Taeniopoda auricornis</i>    | México: Veracruz: Barranca de San Miguel                            | 18.8847 | -97.0019  | 10-XI-2011 | KY864527 | KY864729 | KY864413 | KY864870 |
| 060TauVer | <i>Taeniopoda auricornis</i>    | México: Veracruz: Barranca de San Miguel                            | 18.8847 | -97.0019  | 10-XI-2011 | KY864528 | KY864730 | -        | -        |
| 061TpiGue | <i>Taeniopoda picticornis</i>   | México: Guerrero: Coyuca de Catalán: Arroyo parado                  | 18.3294 | -100.7007 | 22-VI-2013 | KY864529 | KY864657 | -        | KY864871 |
| 062TpiGue | <i>Taeniopoda picticornis</i>   | México: Guerrero: Coyuca de Catalán: Arroyo parado                  | 18.3294 | -100.7007 | 22-VI-2013 | KY864530 | KY864731 | -        | -        |
| 063TpiGue | <i>Taeniopoda picticornis</i>   | México: Guerrero: Coyuca de Catalán: Arroyo parado                  | 18.3294 | -100.7007 | 22-VI-2013 | KY864531 | KY864732 | KY864414 | KY864872 |
| 064TceHgo | <i>Taeniopoda centurio</i>      | México: Hidalgo: Molango                                            | 20.7364 | -98.7173  | 11-IX-2012 | KY864448 | KY864733 | KY864415 | KY864873 |
| 065TceHgo | <i>Taeniopoda centurio</i>      | México: Hidalgo: Molango                                            | 20.7364 | -98.7173  | 11-IX-2012 | KY864449 | -        | -        | -        |
| 081TauVer | <i>Taeniopoda auricornis</i>    | México: Veracruz: Ixhuatlan del café                                | 19.0822 | -97.0297  | 6-X-2013   | KY864532 | KY864734 | -        | KY864874 |
| 082TauVer | <i>Taeniopoda auricornis</i>    | México: Veracruz: Ixhuatlan del café                                | 19.0822 | -97.0297  | 6-X-2013   | KY864457 | KY864735 | -        | -        |
| 083TauVer | <i>Taeniopoda auricornis</i>    | México: Veracruz: Ixhuatlan del café                                | 19.0822 | -97.0297  | 6-X-2013   | KY864452 | KY864736 | -        | -        |
| 084TauVer | <i>Taeniopoda auricornis</i>    | México: Veracruz: Ixhuatlan del café                                | 19.0822 | -97.0297  | 6-X-2013   | KY864533 | KY864737 | -        | -        |
| 085TauVer | <i>Taeniopoda auricornis</i>    | México: Veracruz: Ixhuatlan del café                                | 19.0822 | -97.0297  | 6-X-2013   | KY864534 | KY864738 | KY864416 | KY864875 |
| 086TcQPue | <i>Taeniopoda centurio</i>      | México: Puebla: Cuetzalan                                           | 20.0168 | -97.5271  | 11-X-2013  | KY864454 | KY864663 | -        | -        |
| 087TcePue | <i>Taeniopoda centurio</i>      | México: Puebla: Cuetzalan                                           | 20.0168 | -97.5271  | 11-X-2013  | KY864458 | KY864664 | -        | -        |
| 089TcQPue | <i>Taeniopoda centurio</i>      | México: Puebla: Cuetzalan                                           | 20.0168 | -97.5271  | -          | KY864455 | KY864665 | -        | -        |
| 104TceSLP | <i>Taeniopoda centurio</i>      | México: San Luis Potosí: Xilitla: Cueva de potrerillos              | 21.3072 | -99.0662  | 25-X-2013  | KY864535 | KY864739 | KY864417 | KY864876 |
| 105TceSLP | <i>Taeniopoda centurio</i>      | México: San Luis Potosí: Xilitla: Cueva de potrerillos              | 21.3072 | -99.0662  | 25-X-2014  | KY864536 | KY864740 | -        | -        |
| 106TceSLP | <i>Taeniopoda centurio</i>      | México: San Luis Potosí: Xilitla: Cueva de potrerillos              | 21.3072 | -99.0662  | 25-X-2014  | KY864537 | KY864741 | -        | -        |
| 107TceSLP | <i>Taeniopoda centurio</i>      | México: San Luis Potosí: Xilitla: Cueva de potrerillos              | 21.3072 | -99.0662  | 25-X-2014  | KY864538 | KY864742 | -        | -        |

|           |                                 |                                                             |         |           |             |          |          |          |          |
|-----------|---------------------------------|-------------------------------------------------------------|---------|-----------|-------------|----------|----------|----------|----------|
| 108TceSLP | <i>Taeniopoda centurio</i>      | México: San Luis Potosí: Xilitla: Cueva de potrerillos      | 21.3072 | -99.0662  | 25-X-2014   | KY864539 | KY864743 | -        | -        |
| 109TtaNLe | <i>Taeniopoda tamaulipensis</i> | México: Nuevo León: Linares-San Roberto: Carretera 58 Km 30 | 24.7455 | -99.8152  | 8-XI-2013   | KY864540 | KY864744 | KY864418 | KY864877 |
| 110TtaNLe | <i>Taeniopoda tamaulipensis</i> | México: Nuevo León: Iturbide: Santa Rosa Km 4               | 24.7019 | -99.9079  | 8-XI-2013   | KY864541 | KY864745 | -        | -        |
| 111TtaNLe | <i>Taeniopoda tamaulipensis</i> | México: Nuevo León: Iturbide: Santa Rosa Km 4               | 24.7019 | -99.9079  | 8-XI-2013   | KY864542 | KY864746 | -        | -        |
| 112TtaCoa | <i>Taeniopoda tamaulipensis</i> | México: Coahuila: 30 km antes de Santiago Aserradero        | 25.3891 | -100.253  | 10-XI-2013  | KY864543 | KY864747 | -        | -        |
| 113TtaNLe | <i>Taeniopoda tamaulipensis</i> | México: Nuevo León: Santiago: Cola de Caballo               | 25.364  | -100.1594 | 10-XI-2013  | KY864544 | KY864748 | -        | -        |
| 114TtaNLe | <i>Taeniopoda tamaulipensis</i> | México: Nuevo León: Santiago: Cola de Caballo               | 25.364  | -100.1594 | 10-XI-2013  | KY864545 | KY864749 | -        | -        |
| 115TtaNLe | <i>Taeniopoda tamaulipensis</i> | México: Nuevo León: Santiago: Cola de Caballo               | 25.364  | -100.1594 | 10-XI-2013  | KY864546 | KY864750 | -        | -        |
| 116TtaNLe | <i>Taeniopoda tamaulipensis</i> | México: Nuevo León: Santiago: Cola de Caballo               | 25.364  | -100.1594 | 10-XI-2013  | KY864547 | KY864751 | KY864419 | KY864878 |
| 117CcoCoa | <i>Chromacris colorata</i>      | México: Nuevo León: Santiago: Cola de Caballo               | 25.364  | -100.1594 | 10-XI-2013  | -        | KY864752 | -        | -        |
| 118CcoCoa | <i>Chromacris colorata</i>      | México: Nuevo León: Santiago: Cola de Caballo               | 25.364  | -100.1594 | 10-XI-2013  | -        | KY864753 | -        | -        |
| 123BmaNLe | <i>Brachystola magna</i>        | México: Nuevo León: Galeana: Buenavista                     | 24.8677 | -100.1865 | 9-XI-2013   | KY864548 | KY864754 | KY864420 | KY864879 |
| 125BmaNLe | <i>Brachystola magna</i>        | México: Nuevo León: Galeana: Buenavista                     | 24.8677 | -100.1865 | 9-XI-2013   | KY864549 | KY864755 | -        | KY864880 |
| 131TeqCoa | <i>Taeniopoda eques</i>         | México: Coahuila: Saltillo: La Angostura                    | 25.3275 | -101.026  | 21-X-2013   | KY864550 | KY864756 | -        | -        |
| 132TeqCoa | <i>Taeniopoda eques</i>         | México: Coahuila: Cuatro Ciénegas: Rancho Casita            | 27.1344 | -102.316  | -           | KY864551 | KY864757 | KY864421 | KY864881 |
| 133TeqCoa | <i>Taeniopoda eques</i>         | México: Coahuila: Cuatro Ciénegas: Rancho Casita            | 27.1344 | -102.316  | -           | KY864552 | KY864758 | -        | -        |
| 134TeqCoa | <i>Taeniopoda eques</i>         | México: Coahuila: Cuatro Ciénegas: Rancho Casita            | 27.1344 | -102.316  | -           | KY864553 | KY864759 | -        | -        |
| 135TeqCoa | <i>Taeniopoda eques</i>         | México: Coahuila: Cuatro Ciénegas: Rancho Casita            | 27.1344 | -102.316  | -           | KY864554 | KY864760 | KY864422 | KY864882 |
| 136TtaNLe | <i>Taeniopoda tamaulipensis</i> | México: Nuevo León: Santiago: Near Cola de Caballo          | 25.368  | -100.1606 | 10-VII-2013 | KY864555 | -        | -        | -        |
| 137TtaTam | <i>Taeniopoda tamaulipensis</i> | México: Tamaulipas: Ocampo: Libramiento poniente            | 22.8376 | -99.3413  | 12-X-2013   | KY864556 | -        | -        | -        |
| 138TtaTam | <i>Taeniopoda tamaulipensis</i> | México: Tamaulipas: Ocampo: Libramiento poniente            | 22.8376 | -99.3413  | 12-X-2013   | KY864557 | KY864761 | -        | -        |
| 139TtaTam | <i>Taeniopoda tamaulipensis</i> | México: Tamaulipas: Carretera Tula-Ocampo                   | 22.97   | -99.6117  | 12-X-2013   | KY864558 | KY864762 | -        | -        |

|           |                                 |                                                           |         |          |              |          |          |          |          |
|-----------|---------------------------------|-----------------------------------------------------------|---------|----------|--------------|----------|----------|----------|----------|
| 140TtaTam | <i>Taeniopoda tamaulipensis</i> | México: Tamaulipas: Carretera Tula-Ocampo                 | 22.9478 | -99.6045 | 12-X-2013    | KY864559 | KY864763 | -        | -        |
| 142TceSLP | <i>Taeniopoda centurio</i>      | México: San Luis Potosí: Xilitla                          | 21.396  | -98.9966 | 26-X-2013    | KY864560 | KY864764 | KY864423 | KY864883 |
| 143TauVer | <i>Taeniopoda auricornis</i>    | México: Veracruz: Ixhuatlan del café                      | 19.0822 | -97.0297 | 6-X-2013     | KY864561 | KY864765 | KY864424 | KY864884 |
| 145TpiPue | <i>Taeniopoda picticornis</i>   | México: Puebla: Totoltepec de Guerrero                    | 18.2832 | -97.8072 | 30-XI-2013   | KY864562 | -        | -        | -        |
| 164TceQro | <i>Taeniopoda centurio</i>      | México: Querétaro: Jalpan de Serra: Valle verde, el Pilón | 21.503  | -99.1705 | 26-IV-2014   | KY864563 | KY864766 | -        | -        |
| 165TreCCa | <i>Taeniopoda reticulata</i>    | Costa Rica: Limón: Cahuita                                | 9.7342  | -82.8283 | 15-IV_2014   | KY864564 | KY864767 | -        | -        |
| 166TreCCa | <i>Taeniopoda reticulata</i>    | Costa Rica: Limón: Cahuita                                | 9.7342  | -82.8283 | 15-IV_2014   | KY864565 | -        | -        | -        |
| 167TciOax | <i>Taeniopoda citricornis</i>   | México: Oaxaca: Asunción Ixtaltepec: Santiago Ixtaltepec  | 16.6883 | -94.9047 | 22-XII-2012  | KY864566 | KY864768 | KY864425 | -        |
| 168TtaQro | <i>Taeniopoda tamaulipensis</i> | México: Querétaro: Road to Santa María Cocos              | -       | -        | 18-XI-2013   | KY864567 | KY864769 | -        | -        |
| 169TtaQro | <i>Taeniopoda tamaulipensis</i> | México: Querétaro: Road to Santa María Cocos              | -       | -        | 18-XI-2013   | KY864568 | KY864770 | -        | -        |
| 170TtaQro | <i>Taeniopoda tamaulipensis</i> | México: Querétaro: Road to Santa María Cocos              | -       | -        | 18-XI-2013   | KY864569 | -        | -        | -        |
| 171TtaQro | <i>Taeniopoda tamaulipensis</i> | México: Querétaro: Road to Santa María Cocos              | -       | -        | 18-XI-2013   | KY864570 | KY864771 | -        | -        |
| 172TtaQro | <i>Taeniopoda tamaulipensis</i> | México: Querétaro: Road to Santa María Cocos              | -       | -        | 18-XI-2013   | KY864571 | KY864772 | -        | -        |
| 184TpiGue | <i>Taeniopoda picticornis</i>   | México: Guerrero: Teleoloapan                             | 18.3516 | -99.8437 | 23-XI-2013   | KY864572 | KY864773 | KY864426 | -        |
| 185TpiGue | <i>Taeniopoda picticornis</i>   | México: Guerrero: Teleoloapan                             | 18.3516 | -99.8437 | 23-XI-2013   | KY864573 | KY864658 | -        | -        |
| 186TeqGro | <i>Taeniopoda eques</i>         | México: Guerrero: Tierra Colorada                         | 17.1569 | -99.5408 | VII-2012     | KY864469 | -        | -        | -        |
| 188TceQro | <i>Taeniopoda centurio</i>      | México: Querétaro: Jalpan de Serra: Valle verde, el Pilón | 21.503  | -99.1705 | 16-VIII-2014 | KY864574 | -        | -        | -        |
| 189TceQro | <i>Taeniopoda centurio</i>      | México: Querétaro: Jalpan de Serra: Valle verde, el Pilón | 21.503  | -99.1705 | 16-VIII-2014 | KY864575 | -        | -        | -        |
| 190TceQro | <i>Taeniopoda centurio</i>      | México: Querétaro: Jalpan de Serra: Valle verde, el Pilón | 21.503  | -99.1705 | 16-VIII-2014 | KY864576 | KY864774 | -        | KY864885 |
| 191TceQro | <i>Taeniopoda centurio</i>      | México: Querétaro: Jalpan de Serra: Valle verde, el Pilón | 21.503  | -99.1705 | 16-VIII-2014 | KY864577 | KY864775 | -        | -        |
| 192TceQro | <i>Taeniopoda centurio</i>      | México: Querétaro: Jalpan de Serra: Valle verde, el Pilón | 21.503  | -99.1705 | 16-VIII-2014 | KY864578 | -        | -        | -        |
| 193TceQro | <i>Taeniopoda centurio</i>      | México: Querétaro: Jalpan de Serra: Valle verde, el Pilón | 21.503  | -99.1705 | 16-VIII-2014 | KY864579 | -        | -        | -        |
| 194TceQro | <i>Taeniopoda centurio</i>      | México: Querétaro: Jalpan de Serra: Valle verde, el Pilón | 21.503  | -99.1705 | 16-VIII-2014 | KY864580 | KY864776 | KY864427 | -        |
| 195TceQro | <i>Taeniopoda centurio</i>      | México: Querétaro: Jalpan de Serra: Valle verde, el Pilón | 21.503  | -99.1705 | 16-VIII-2014 | KY864581 | -        | -        | -        |
| 196TceQro | <i>Taeniopoda centurio</i>      | México: Querétaro: Jalpan de Serra: Valle verde, el Pilón | 21.503  | -99.1705 | 16-VIII-2014 | KY864582 | KY864667 | -        | -        |

|           |                                 |                                              |         |           |             |          |          |          |          |
|-----------|---------------------------------|----------------------------------------------|---------|-----------|-------------|----------|----------|----------|----------|
| 198TtaQro | <i>Taeniopoda tamaulipensis</i> | México: Queretaro: Sierra Gorda              | -       | -         | 24-VII-2014 | KY864583 | KY864666 | -        | -        |
| 199TobYuc | <i>Taeniopoda obscura</i>       | México: Yucatán: Kaxil kiuic                 | 20.0929 | -89.5638  | 30-VII-2014 | KY864584 | KY864777 | -        | -        |
| 200TobYuc | <i>Taeniopoda obscura</i>       | México: Yucatán: Kaxil kiuic                 | 20.0929 | -89.5638  | 30-VII-2014 | KY864585 | KY864778 | KY864428 | KY864886 |
| 202TobYuc | <i>Taeniopoda obscura</i>       | México: Yucatán: Kaxil kiuic                 | 20.0929 | -89.5638  | 30-VII-2014 | KY864586 | KY864779 | KY864429 | KY864887 |
| 203TpiGue | <i>Taeniopoda picticornis</i>   | México: Guerrero: Ceiba Mocha                | 18.0291 | -101.1013 | -           | KY864445 | KY864668 | -        | -        |
| 204TreCPt | <i>Taeniopoda reticulata</i>    | Costa Rica: Limón: Puerto Viejo de Talamanca | 9.6529  | -82.7396  | 9-IX-2014   | KY864587 | KY864780 | KY864430 | KY864888 |
| 205TreCPt | <i>Taeniopoda reticulata</i>    | Costa Rica: Limón: Puerto Viejo de Talamanca | 9.6529  | -82.7396  | 9-IX-2014   | KY864588 | KY864781 | -        | -        |
| 206TreCPt | <i>Taeniopoda reticulata</i>    | Costa Rica: Limón: Puerto Viejo de Talamanca | 9.6529  | -82.7396  | 9-IX-2014   | KY864589 | KY864660 | -        | -        |
| 207TreCPt | <i>Taeniopoda reticulata</i>    | Costa Rica: Limón: Puerto Viejo de Talamanca | 9.6529  | -82.7396  | 9-IX-2014   | KY864590 | KY864782 | -        | -        |
| 208TreCCa | <i>Taeniopoda reticulata</i>    | Costa Rica: Limón: Cahuita                   | 9.7343  | -82.8279  | 9-IX-2014   | KY864591 | KY864661 | -        | -        |
| 209TreCCa | <i>Taeniopoda reticulata</i>    | Costa Rica: Limón: Cahuita                   | 9.7343  | -82.8279  | 9-IX-2014   | KY864592 | KY864783 | -        | -        |
| 210TreCCa | <i>Taeniopoda reticulata</i>    | Costa Rica: Limón: Cahuita                   | 9.7343  | -82.8279  | 9-IX-2014   | KY864593 | KY864784 | KY864431 | KY864889 |
| 211TreCCa | <i>Taeniopoda reticulata</i>    | Costa Rica: Limón: Cahuita                   | 9.7343  | -82.8279  | 9-IX-2014   | KY864594 | KY864785 | -        | -        |
| 212TreCCa | <i>Taeniopoda reticulata</i>    | Costa Rica: Limón: Cahuita                   | 9.7343  | -82.8279  | 9-IX-2014   | KY864595 | KY864786 | -        | -        |
| 213TreCCa | <i>Taeniopoda reticulata</i>    | Costa Rica: Limón: Cahuita                   | 9.7343  | -82.8279  | 9-IX-2014   | KY864596 | KY864787 | -        | -        |
| 214TreCCa | <i>Taeniopoda reticulata</i>    | Costa Rica: Limón: Cahuita                   | 9.7343  | -82.8279  | 9-IX-2014   | KY864597 | KY864788 | -        | -        |
| 215TreCCa | <i>Taeniopoda reticulata</i>    | Costa Rica: Limón: Cahuita                   | 9.7343  | -82.8279  | 9-IX-2014   | KY864598 | KY864789 | -        | -        |
| 216TreCCa | <i>Taeniopoda reticulata</i>    | Costa Rica: Limón: Cahuita                   | 9.7343  | -82.8279  | 9-IX-2014   | KY864599 | KY864790 | KY864432 | KY864890 |
| 217TreCli | <i>Taeniopoda reticulata</i>    | Costa Rica: Limón: Limón                     | 9.9829  | -83.0314  | 9-IX-2014   | KY864600 | KY864791 | -        | -        |
| 218TreCli | <i>Taeniopoda reticulata</i>    | Costa Rica: Limón: Limón                     | 9.9829  | -83.0314  | 9-IX-2014   | KY864601 | KY864792 | -        | -        |
| 219TreCli | <i>Taeniopoda reticulata</i>    | Costa Rica: Limón: Limón                     | 9.9829  | -83.0314  | 9-IX-2014   | KY864602 | KY864793 | KY864433 | KY864891 |
| 220TreCli | <i>Taeniopoda reticulata</i>    | Costa Rica: Limón: Limón                     | 9.9829  | -83.0314  | 9-IX-2014   | KY864603 | KY864662 | -        | -        |
| 221TreCli | <i>Taeniopoda reticulata</i>    | Costa Rica: Limón: Limón                     | 9.9829  | -83.0314  | 9-IX-2014   | KY864604 | KY864794 | -        | -        |
| 222TreCli | <i>Taeniopoda reticulata</i>    | Costa Rica: Limón: Limón                     | 9.9829  | -83.0314  | 9-IX-2014   | KY864605 | KY864795 | -        | -        |
| 223TeqHgo | <i>Taeniopoda eques</i>         | México: Hidalgo: Tula de Allende             | 20.0786 | -99.3527  | 24-IX-2014  | KY864460 | KY864675 | -        | -        |
| 224TeqHgo | <i>Taeniopoda eques</i>         | México: Hidalgo: Tula de Allende             | 20.0786 | -99.3527  | 24-IX-2014  | KY864461 | KY864676 | -        | -        |
| 225TeqEMx | <i>Taeniopoda eques</i>         | Mexico: Estado de México: Ixtapaluca         | 19.3145 | -98.8845  | 3-III-2014  | KY864467 | KY864677 | -        | -        |
| 226TpiEMx | <i>Taeniopoda picticornis</i>   | México: Estado de México: Ixtapan de la sal  | 18.8447 | 99.6658   | 5,6-X-2013  | KY864606 | -        | -        | -        |
| 227TtaQro | <i>Taeniopoda tamaulipensis</i> | México: Querétaro: Sierra Gorda: Arroyo Seco | 21.5708 | -99.712   | 14-IX-2014  | KY864607 | KY864796 | -        | KY864892 |
| 228TtaQro | <i>Taeniopoda tamaulipensis</i> | México: Querétaro: Sierra Gorda: Arroyo Seco | 21.5708 | -99.712   | 14-IX-2014  | KY864608 | KY864797 | -        | -        |
| 232TstMor | <i>Taeniopoda stali</i>         | México: Morelos: Tepalcingo: El Limón        | 18.5328 | -98.9391  | 25-VII-2014 | KY864609 | -        | -        | -        |

|           |                               |                                                          |         |          |            |          |          |          |          |
|-----------|-------------------------------|----------------------------------------------------------|---------|----------|------------|----------|----------|----------|----------|
| 234TciChi | <i>Taeniopoda citricornis</i> | México: Chiapas: Tuxtla Gutiérrez: Copoya                | 16.7135 | -93.1173 | 6-VII-2014 | KY864610 | -        | -        | -        |
| 235TciChi | <i>Taeniopoda citricornis</i> | México: Chiapas: Tuxtla Gutiérrez: Copoya                | 16.7135 | -93.1173 | 6-VII-2014 | KY864611 | -        | -        | -        |
| 236TciChi | <i>Taeniopoda citricornis</i> | México: Chiapas: Tuxtla Gutiérrez: Copoya                | 16.7135 | -93.1173 | 6-VII-2014 | KY864612 | -        | -        | -        |
| 237TciChi | <i>Taeniopoda citricornis</i> | México: Chiapas: Tuxtla Gutiérrez: Copoya                | 16.7061 | -93.1173 | 13-IX-2014 | KY864613 | -        | -        | -        |
| 238TciChi | <i>Taeniopoda citricornis</i> | México: Chiapas: Tuxtla Gutiérrez: Copoya                | 16.7061 | -93.1173 | 13-IX-2014 | KY864614 | KY864659 | -        | -        |
| 239TciChi | <i>Taeniopoda citricornis</i> | México: Chiapas: Tuxtla Gutiérrez: Copoya                | 16.7061 | -93.1173 | 13-IX-2014 | KY864615 | KY864798 | -        | -        |
| 240TciChi | <i>Taeniopoda citricornis</i> | México: Chiapas: Tuxtla Gutiérrez: Copoya                | 16.7061 | -93.1173 | 13-IX-2014 | KY864616 | KY864799 | -        | -        |
| 241TciChi | <i>Taeniopoda citricornis</i> | México: Chiapas: Tuxtla Gutiérrez: Copoya                | 16.7061 | -93.1173 | 13-IX-2014 | KY864617 | KY864669 | -        | -        |
| 242TciChi | <i>Taeniopoda citricornis</i> | México: Chiapas: Tuxtla Gutiérrez: Copoya                | 16.7061 | -93.1173 | 13-IX-2014 | KY864618 | KY864800 | -        | -        |
| 243TciChi | <i>Taeniopoda citricornis</i> | México: Chiapas: Tuxtla Gutiérrez: Copoya                | 16.7061 | -93.1173 | 13-IX-2014 | KY864619 | KY864801 | -        | -        |
| 244TstVer | <i>Taeniopoda stali</i>       | México: Veracruz: Acultzingo: Tecamalucan                | 18.76   | -97.21   | 12-IX-2014 | KY864620 | KY864802 | -        | -        |
| 245TstVer | <i>Taeniopoda stali</i>       | México: Veracruz: Acultzingo: Tecamalucan                | 18.76   | -97.21   | 12-IX-2014 | KY864621 | KY864803 | -        | -        |
| 246TstVer | <i>Taeniopoda stali</i>       | México: Veracruz: Acultzingo: Tecamalucan                | 18.76   | -97.21   | 12-IX-2014 | KY864622 | KY864804 | KY864434 | -        |
| 249TstVer | <i>Taeniopoda stali</i>       | México: Veracruz: Acultzingo: Tecamalucan                | 18.76   | -97.21   | 12-IX-2014 | KY864623 | KY864805 | -        | KY864893 |
| 257CvaGUA | <i>Cibotopteryx variegata</i> | Guatemala: Guatemala: Villa Canales                      | 14.4499 | -90.5098 | 29-IX-2014 | KY864624 | -        | -        | -        |
| 259CvaGUA | <i>Cibotopteryx variegata</i> | Guatemala: Sacatepequez: Alotenango                      | 14.4636 | -90.8142 | 26-IX-2014 | KY864625 | KY864806 | KY864435 | KY864894 |
| 260TciChi | <i>Taeniopoda citricornis</i> | México: Chiapas: Tierra y Libertad                       | 16.3689 | -93.8685 | IX-2014    | KY864626 | KY864807 | -        | KY864895 |
| 267TciChi | <i>Taeniopoda citricornis</i> | México: Chiapas: Tierra y Libertad                       | 16.3689 | -93.8685 | IX-2014    | KY864627 | KY864808 | KY864436 | KY864896 |
| 269TauVer | <i>Taeniopoda auricornis</i>  | México: Veracruz: Teocelo                                | 19.3845 | -96.981  | 26-X-2014  | -        | KY864809 | -        | -        |
| 272TreCli | <i>Taeniopoda reticulata</i>  | Costa Rica: Limón: Limón                                 | 9.8229  | -83.0314 | 9-X-2014   | -        | KY864810 | -        | -        |
| 275TreCPt | <i>Taeniopoda reticulata</i>  | Costa Rica: Limón: Puerto Viejo de Talamanca             | 9.6529  | -82.7396 | 9-IX-2014  | KY864628 | KY864811 | -        | -        |
| 276TciOax | <i>Taeniopoda citricornis</i> | México: Oaxaca: Asunción Ixtaltepec: Santiago Ixtaltepec | 16.6883 | -94.9047 | X-2014     | KY864629 | KY864812 | -        | -        |
| 277TciOax | <i>Taeniopoda citricornis</i> | México: Oaxaca: Asunción Ixtaltepec: Santiago Ixtaltepec | 16.6883 | -94.9047 | X-2014     | KY864630 | KY864813 | -        | KY864897 |
| 279TciOax | <i>Taeniopoda citricornis</i> | México: Oaxaca: Asunción Ixtaltepec: Santiago Ixtaltepec | 16.6883 | -94.9047 | X-2014     | KY864631 | KY864814 | KY864437 | KY864898 |

|           |                                  |                                                          |         |           |              |          |          |   |          |
|-----------|----------------------------------|----------------------------------------------------------|---------|-----------|--------------|----------|----------|---|----------|
| 280TciOax | <i>Taeniopoda citricornis</i>    | México: Oaxaca: Asunción Ixtaltepec: Santiago Ixtaltepec | 16.6883 | -94.9047  | X-2014       | KY864632 | KY864815 | - | -        |
| 281TciOax | <i>Taeniopoda citricornis</i>    | México: Oaxaca: Asunción Ixtaltepec: Santiago Ixtaltepec | 16.6883 | -94.9047  | X-2014       | KY864633 | KY864816 | - | -        |
| 289TciOax | <i>Taeniopoda citricornis</i>    | México: Oaxaca: Asunción Ixtaltepec: Santiago Ixtaltepec | 16.6883 | -94.9047  | X-2014       | KY864634 | -        | - | -        |
| 303TRcMx  | <i>Tropidacris cristata</i>      | México: Querétaro: Pinal de Amoles                       | -       | -         | 26-V-2015    | KY864650 | KY864832 | - | KY864899 |
| 304TvaCPu | <i>Taeniopoda varipennis</i>     | Costa Rica: Puntarenas: Curré                            | 8.9754  | -83.3036  | 25-VI-2015   | KY864635 | KY864817 | - | -        |
| 305TvaCPu | <i>Taeniopoda varipennis</i>     | Costa Rica: Puntarenas: Curré                            | 8.9754  | -83.3036  | 25-VI-2015   | KY864636 | KY864818 | - | KY864900 |
| 306TvaCPu | <i>Taeniopoda varipennis</i>     | Costa Rica: Puntarenas: Curré                            | 8.9754  | -83.3036  | 25-VI-2015   | KY864637 | KY864819 | - | -        |
| 307TvaCPu | <i>Taeniopoda varipennis</i>     | Costa Rica: Puntarenas: Curré                            | 8.9754  | -83.3036  | 25-VI-2015   | KY864638 |          | - | -        |
| 308TvaCPu | <i>Taeniopoda varipennis</i>     | Costa Rica: Puntarenas: Curré                            | 8.9754  | -83.3036  | 25-VI-2015   | -        | KY864820 | - | -        |
| 309TvaCPu | <i>Taeniopoda varipennis</i>     | Costa Rica: Puntarenas: Curré                            | 8.9754  | -83.3036  | 25-VI-2015   | KY864639 | KY864821 | - | KY864901 |
| 310TvaCPu | <i>Taeniopoda varipennis</i>     | Costa Rica: Puntarenas: Curré                            | 8.9754  | -83.3036  | 25-VI-2015   | KY864640 | KY864822 | - | -        |
| 311TvaCPu | <i>Taeniopoda varipennis</i>     | Costa Rica: Puntarenas: Curré                            | 8.9754  | -83.3036  | 25-VI-2015   | KY864641 | KY864823 | - | -        |
| 312TvaCPu | <i>Taeniopoda varipennis</i>     | Costa Rica: Puntarenas: Curré                            | 8.9754  | -83.3036  | 25-VI-2015   | KY864642 | KY864824 | - | KY864902 |
| 313TvaCPu | <i>Taeniopoda varipennis</i>     | Costa Rica: Puntarenas: Curré                            | 8.9754  | -83.3036  | 25-VI-2015   | KY864643 | KY864825 | - | -        |
| 314TvaCPu | <i>Taeniopoda varipennis</i>     | Costa Rica: Puntarenas: Curré                            | 8.9754  | -83.3036  | 25-VI-2015   | KY864644 | -        | - | -        |
| 315TvaCPu | <i>Taeniopoda varipennis</i>     | Costa Rica: Puntarenas: Curré                            | 8.9754  | -83.3036  | 25-VI-2015   | KY864645 | -        | - | -        |
| 316TvaCPu | <i>Taeniopoda varipennis</i>     | Costa Rica: Puntarenas: Curré                            | 8.9754  | -83.3036  | 25-VI-2015   | KY864646 | KY864826 | - | KY864903 |
| 317TvaCPu | <i>Taeniopoda varipennis</i>     | Costa Rica: Puntarenas: Curré                            | 8.9754  | -83.3036  | 25-VI-2015   | KY864647 | KY864827 | - | -        |
| 318TvaCPu | <i>Taeniopoda varipennis</i>     | Costa Rica: Puntarenas: Curré                            | 8.9754  | -83.3036  | 25-VI-2015   | KY864648 | KY864828 | - | -        |
| 319TvaCPu | <i>Taeniopoda varipennis</i>     | Costa Rica: Puntarenas: Curré                            | 8.9754  | -83.3036  | 25-VI-2015   | -        | KY864829 | - | -        |
| 320TvaCPu | <i>Taeniopoda varipennis</i>     | Costa Rica: Puntarenas: Curré                            | 8.9754  | -83.3036  | 25-VI-2015   | KY864649 | KY864830 | - | KY864904 |
| 321TpiGue | <i>Taeniopoda picticornis</i>    | México: Guerrero: Zihuatanejo: Cerro del vigía           | 17.6205 | -101.5452 | 15-VII-2015  | -        | KY864831 | - | -        |
| 322TtaNL  | <i>Taeniopoda tamaulipensis</i>  | México: Nuevo León: Galeana: Puente de Dios              | 24.8839 | -100.0944 | 15-VIII-2015 | KY864651 | -        | - | -        |
| 324TeqDgo | <i>Taeniopoda eques</i>          | México: Durango: Carretera Torreón                       | 25.5302 | -103.6666 | 11-VIII-2015 | KY864652 | KY864833 | - | -        |
| 325TeqDgo | <i>Taeniopoda eques</i>          | México: Durango: Carretera Torreón                       | 25.5302 | -103.6666 | 11-VIII-2015 | KY864653 | -        | - | -        |
| 326TeqSLP | <i>Taeniopoda eques</i>          | México: San Luis Potosí: Xilitla                         | 21.3957 | -98.9921  | 17-VII-2015  | KY864468 | -        | - | -        |
| 327TauGcf | <i>Taeniopoda cf. auricornis</i> | Guatemala: Baja Verapaz: Purulhá: Orejuela               | 15.2496 | -90.1559  | 26-IX-2015   | -        | KY864834 | - | -        |
| 328TauGcf | <i>Taeniopoda cf. auricornis</i> | Guatemala: Baja Verapaz: Purulhá: Orejuela               | 15.2496 | -90.1559  | 26-IX-2015   | -        | KY864835 | - | -        |
| 329TauGcf | <i>Taeniopoda cf. auricornis</i> | Guatemala: Baja Verapaz: Purulhá: Orejuela               | 15.2496 | -90.1559  | 26-IX-2015   | KY864654 | KY864836 | - | -        |
| 330TauGcf | <i>Taeniopoda cf. auricornis</i> | Guatemala: Baja Verapaz: Purulhá: Orejuela               | 15.2496 | -90.1559  | 26-IX-2015   | KY864655 | KY864837 | - | -        |



|           |                                  |                                                      |         |          |             |          |          |          |          |
|-----------|----------------------------------|------------------------------------------------------|---------|----------|-------------|----------|----------|----------|----------|
| 331TauGcf | <i>Taeniopoda cf. auricornis</i> | Guatemala: Baja Verapaz: Purulhá: Orejuela           | 15.2496 | -90.1559 | 26-IX-2015  | KY864656 | KY864838 | -        | -        |
| 332TauGcf | <i>Taeniopoda cf. auricornis</i> | Guatemala: Baja Verapaz: Purulhá: Orejuela           | 15.2496 | -90.1559 | 26-IX-2015  | -        | KY864839 | -        | -        |
| 333TauGcf | <i>Taeniopoda cf. auricornis</i> | Guatemala: Baja Verapaz: Purulhá: Orejuela           | 15.2496 | -90.1559 | 26-IX-2015  | .        | KY864840 | -        | -        |
| 339TauGcf | <i>Taeniopoda cf. auricornis</i> | Guatemala: El Petén: Poptún: Finca las Jarrillas     | 16.3051 | -89.4096 | 4-VII-2015  | KY864472 | KY864841 | KY864438 | KY864905 |
| 340TguGua | <i>Taeniopoda gutturosa</i>      | Guatemala: Retalhuleu: Finca Los Brillantes          | 14.5575 | -91.6184 | 13-VI-2016  | KY864473 | KY864842 | KY864439 | KY864906 |
| 341TguGua | <i>Taeniopoda gutturosa</i>      | Guatemala: Retalhuleu: Finca Los Brillantes          | 14.5575 | -91.6184 | 13-VI-2016  | KY864474 | KY864843 | KY864440 | KY864907 |
| 342TguGua | <i>Taeniopoda gutturosa</i>      | Guatemala: Retalhuleu: Finca Los Brillantes          | 14.5575 | -91.6184 | 13-VI-2016  | KY864475 | KY864844 | KY864441 | KY864908 |
| 343TguGua | <i>Taeniopoda gutturosa</i>      | Guatemala: Retalhuleu: Finca Los Brillantes          | 14.5575 | -91.6184 | 13-VI-2016  | KY864476 | KY864845 | KY864442 | KY864909 |
| 344TguGua | <i>Taeniopoda gutturosa</i>      | Guatemala: Retalhuleu: Finca Los Brillantes          | 14.5575 | -91.6184 | 13-VI-2016  | KY864477 | KY864846 | -        | KY864910 |
| 345TguGua | <i>Taeniopoda gutturosa</i>      | Guatemala: Retalhuleu: Finca Los Brillantes          | 14.5575 | -91.6184 | 13-VI-2016  | KY864478 | -        | -        | KY864911 |
| 350RomUS  | <i>Romalea microptera</i>        | USA: Florida: Collier Co: Big Cypress Bend           | 25.9424 | -81.4697 | 5-VIII-2009 | KY864479 | KY864847 | KY864443 | KY864912 |
| 351RomUS  | <i>Romalea microptera</i>        | USA: Florida: Collier Co: Port of the Islands Marina | 25.9571 | -81.5132 | 7-VIII-2009 | KY864480 | KY864848 | -        | KY864913 |
| 352RomUS  | <i>Romalea microptera</i>        | USA: Florida: Collier Co: Big Cypress Bend           | 25.9424 | -81.4697 | 5-VIII-2009 | KY864481 | -        | -        | KY864914 |
| 353RomUS  | <i>Romalea microptera</i>        | USA: Florida: Collier Co: Port of the Islands Marina | 25.9571 | -81.5132 | 7-VIII-2009 | KY864482 | KY864849 | KY864444 | KY864915 |
| 354RomUS  | <i>Romalea microptera</i>        | USA: Florida: Putnam Co: Katharine Ordway Preserve   | 29.7082 | -82.0002 | 7-VII-2002  | KY864483 | KY864850 | -        | KY864916 |
