# Supplementary material
Source: publisher figshare collection journal article supplement (https://tandf.figshare.com/articles/dataset/_/4982567)
Supplement: Supplementary file 5 [file 1]

28S

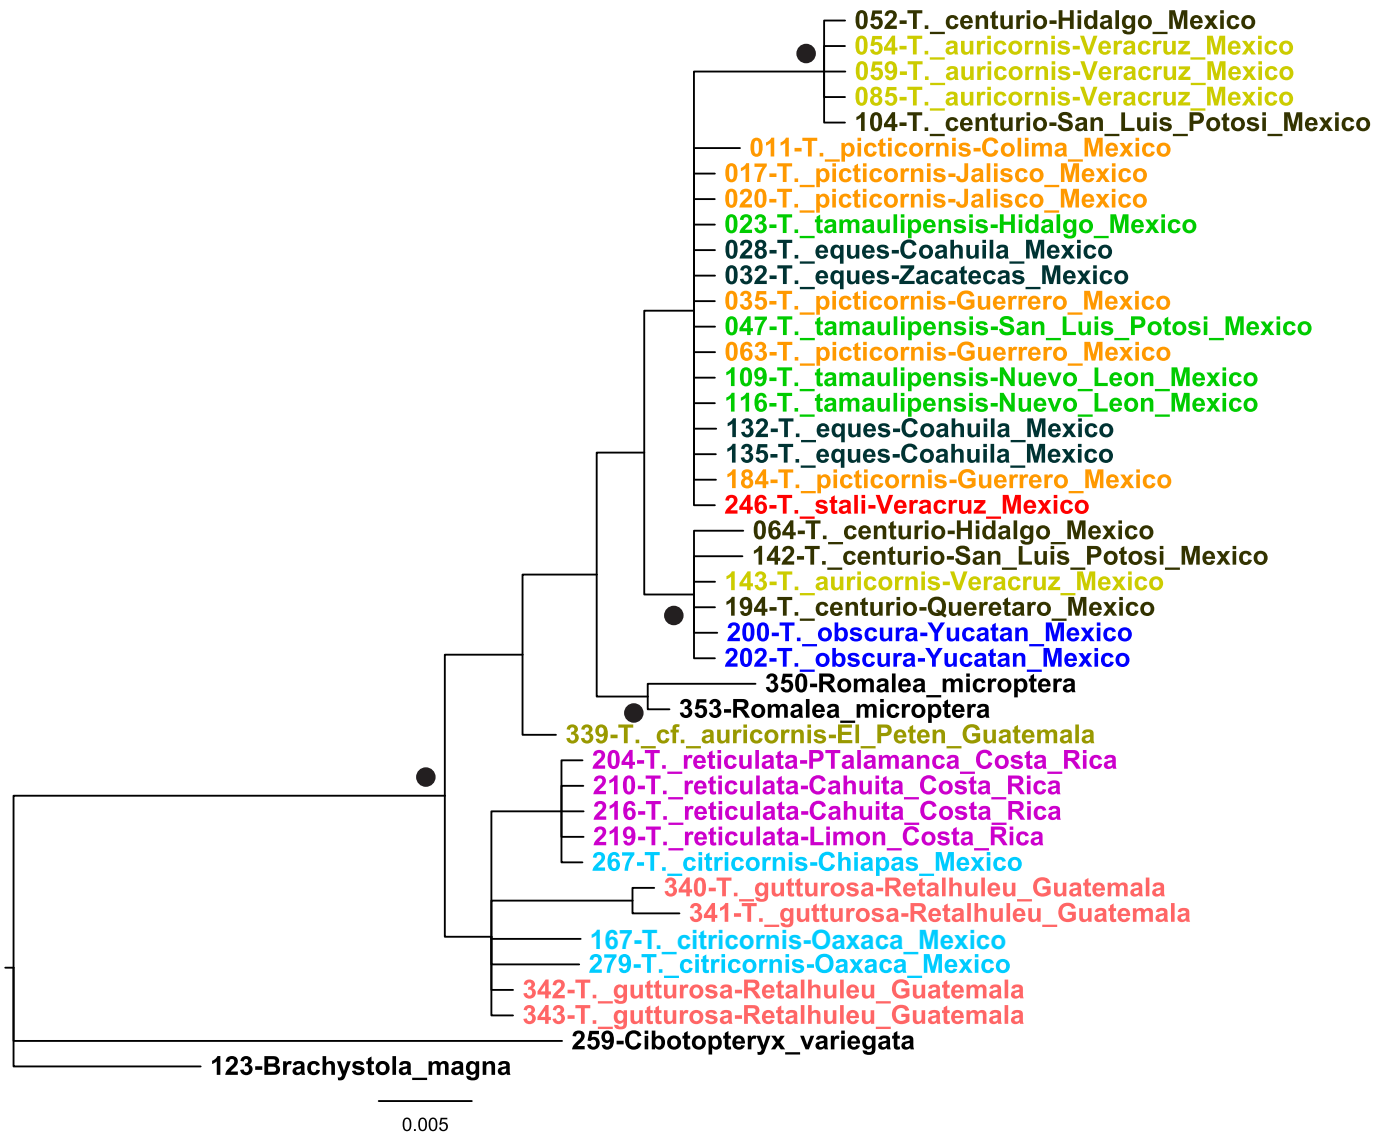

H3

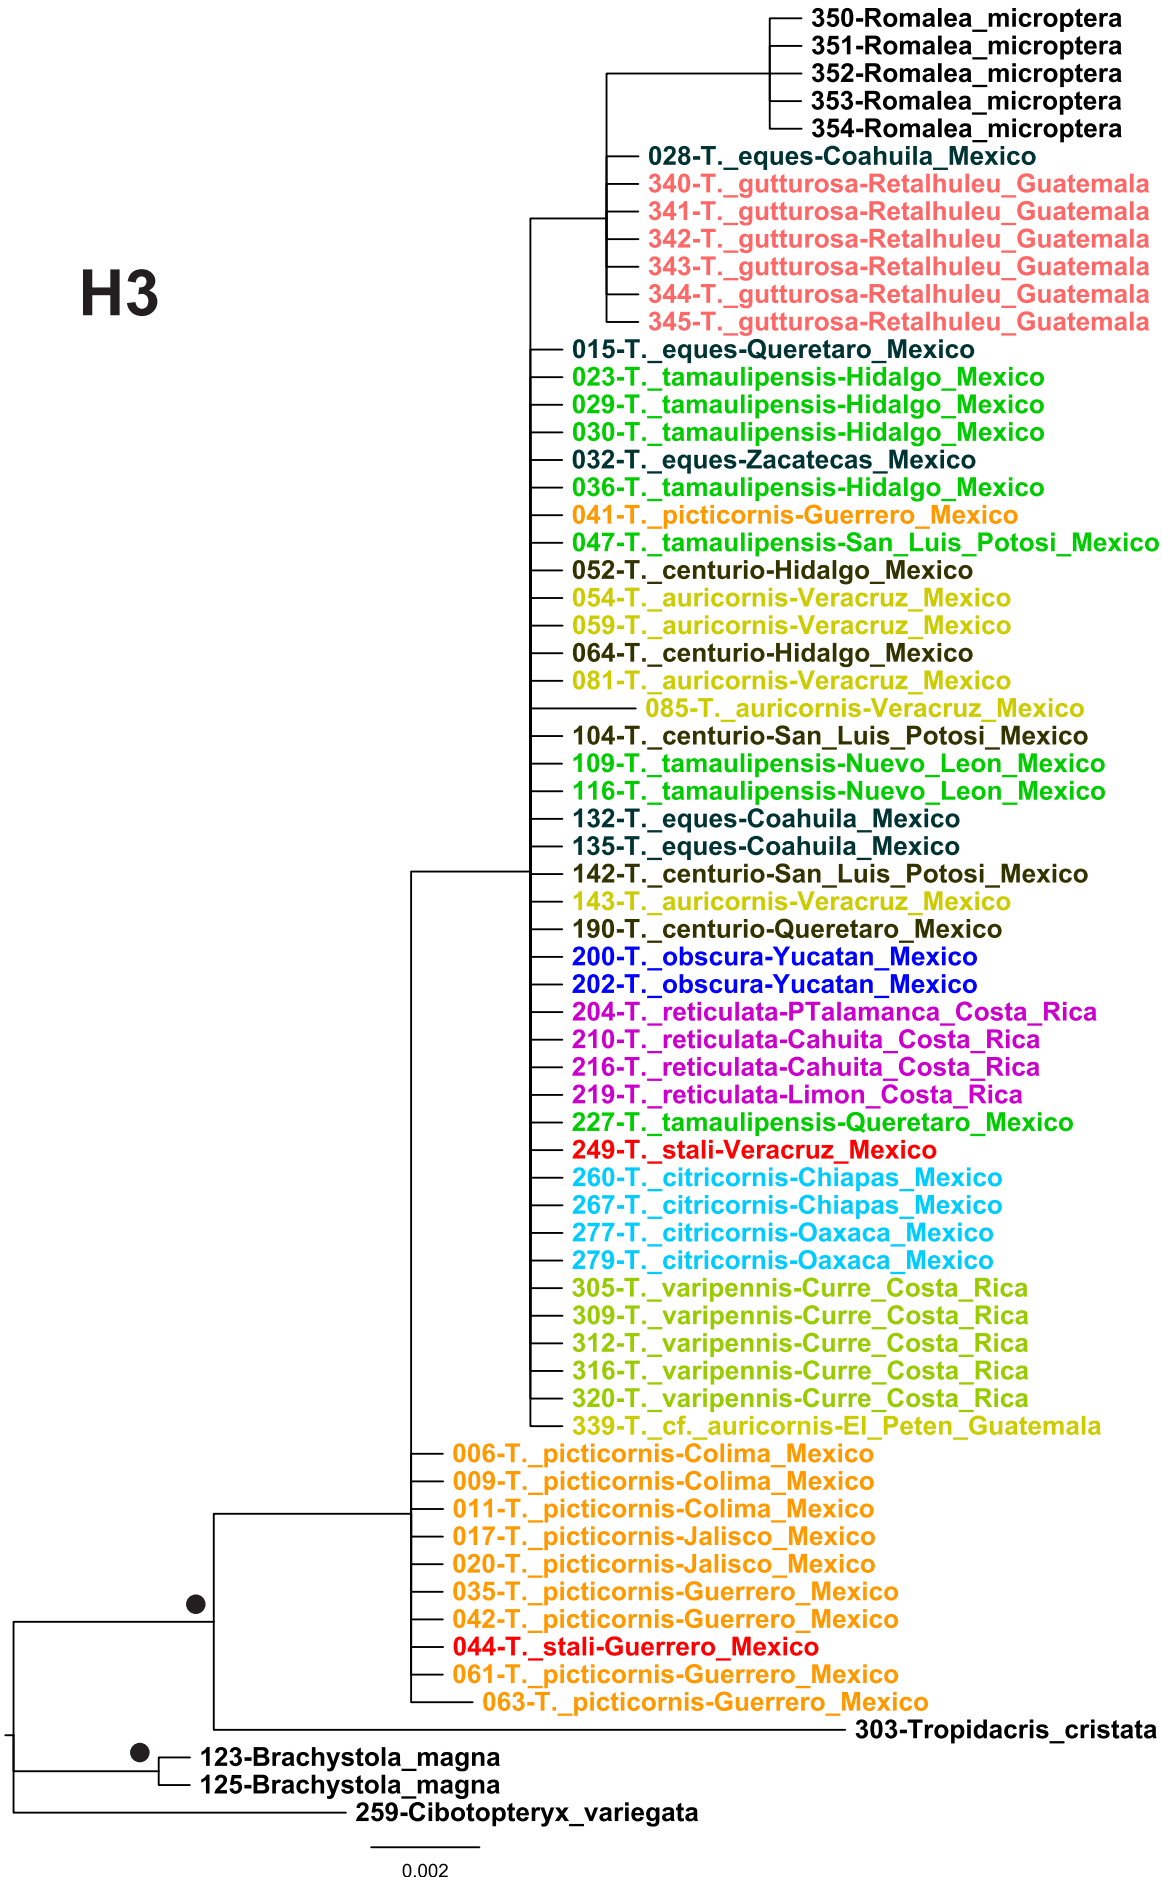

**Supplementary material 7.** Bayesian phylograms derived from the separate 28S and H3 markers. Black circles near branches indicate Bayesian posterior probabilities  $\geq 0.95$ .
