# Supplementary material
Source: publisher figshare collection journal article supplement (https://tandf.figshare.com/articles/dataset/_/4982567)

Supplementary material 9. Ultrametric trees showing the results of the GMYC model for the separated COI and *cyt b* and for the concatenated COI + *cyt b* matrices.

COI Yule prior

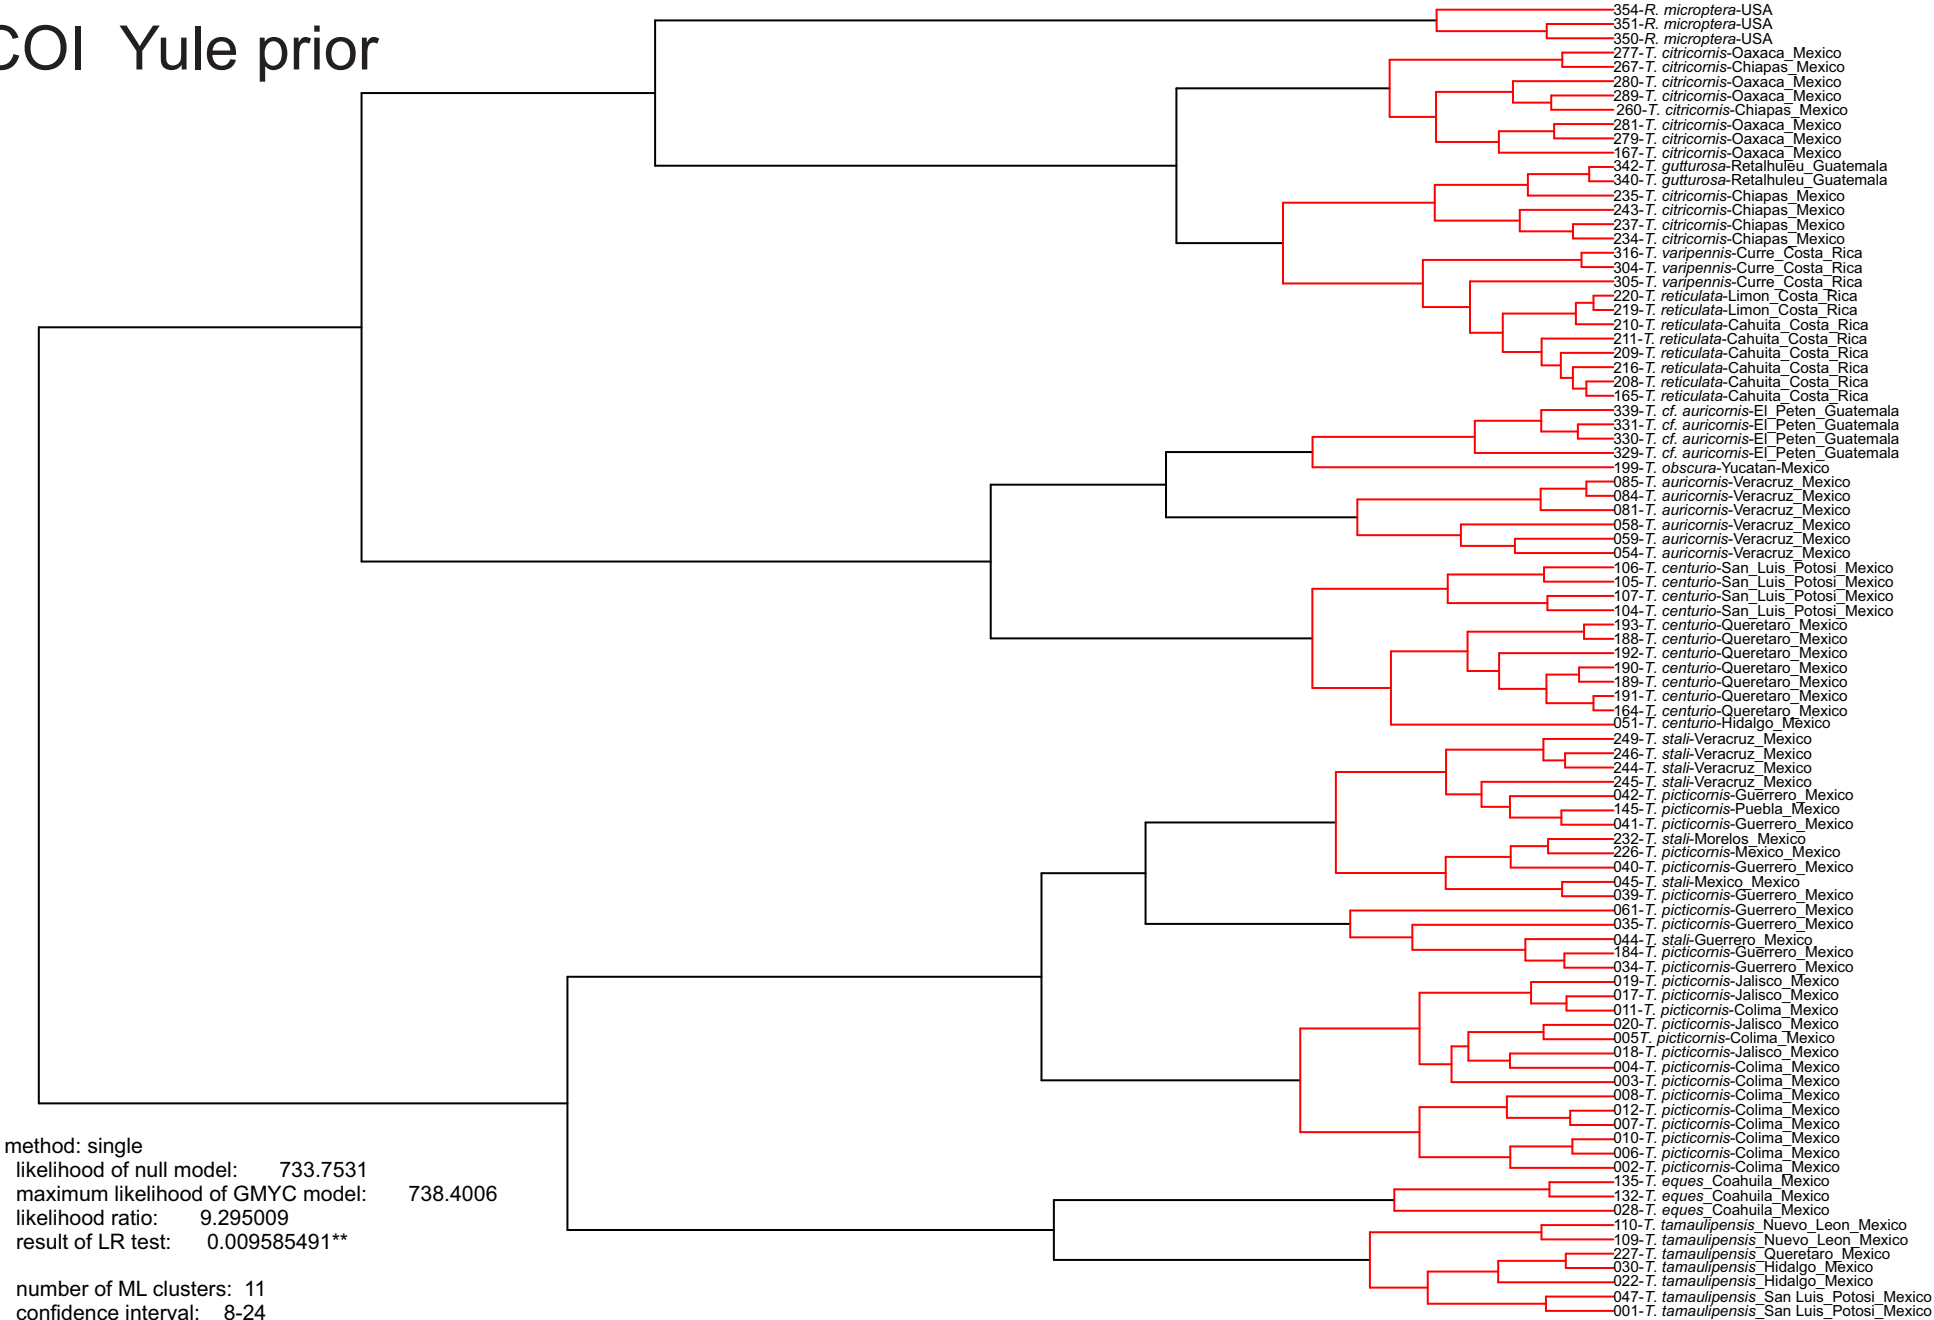

# cyt *b* Yule prior

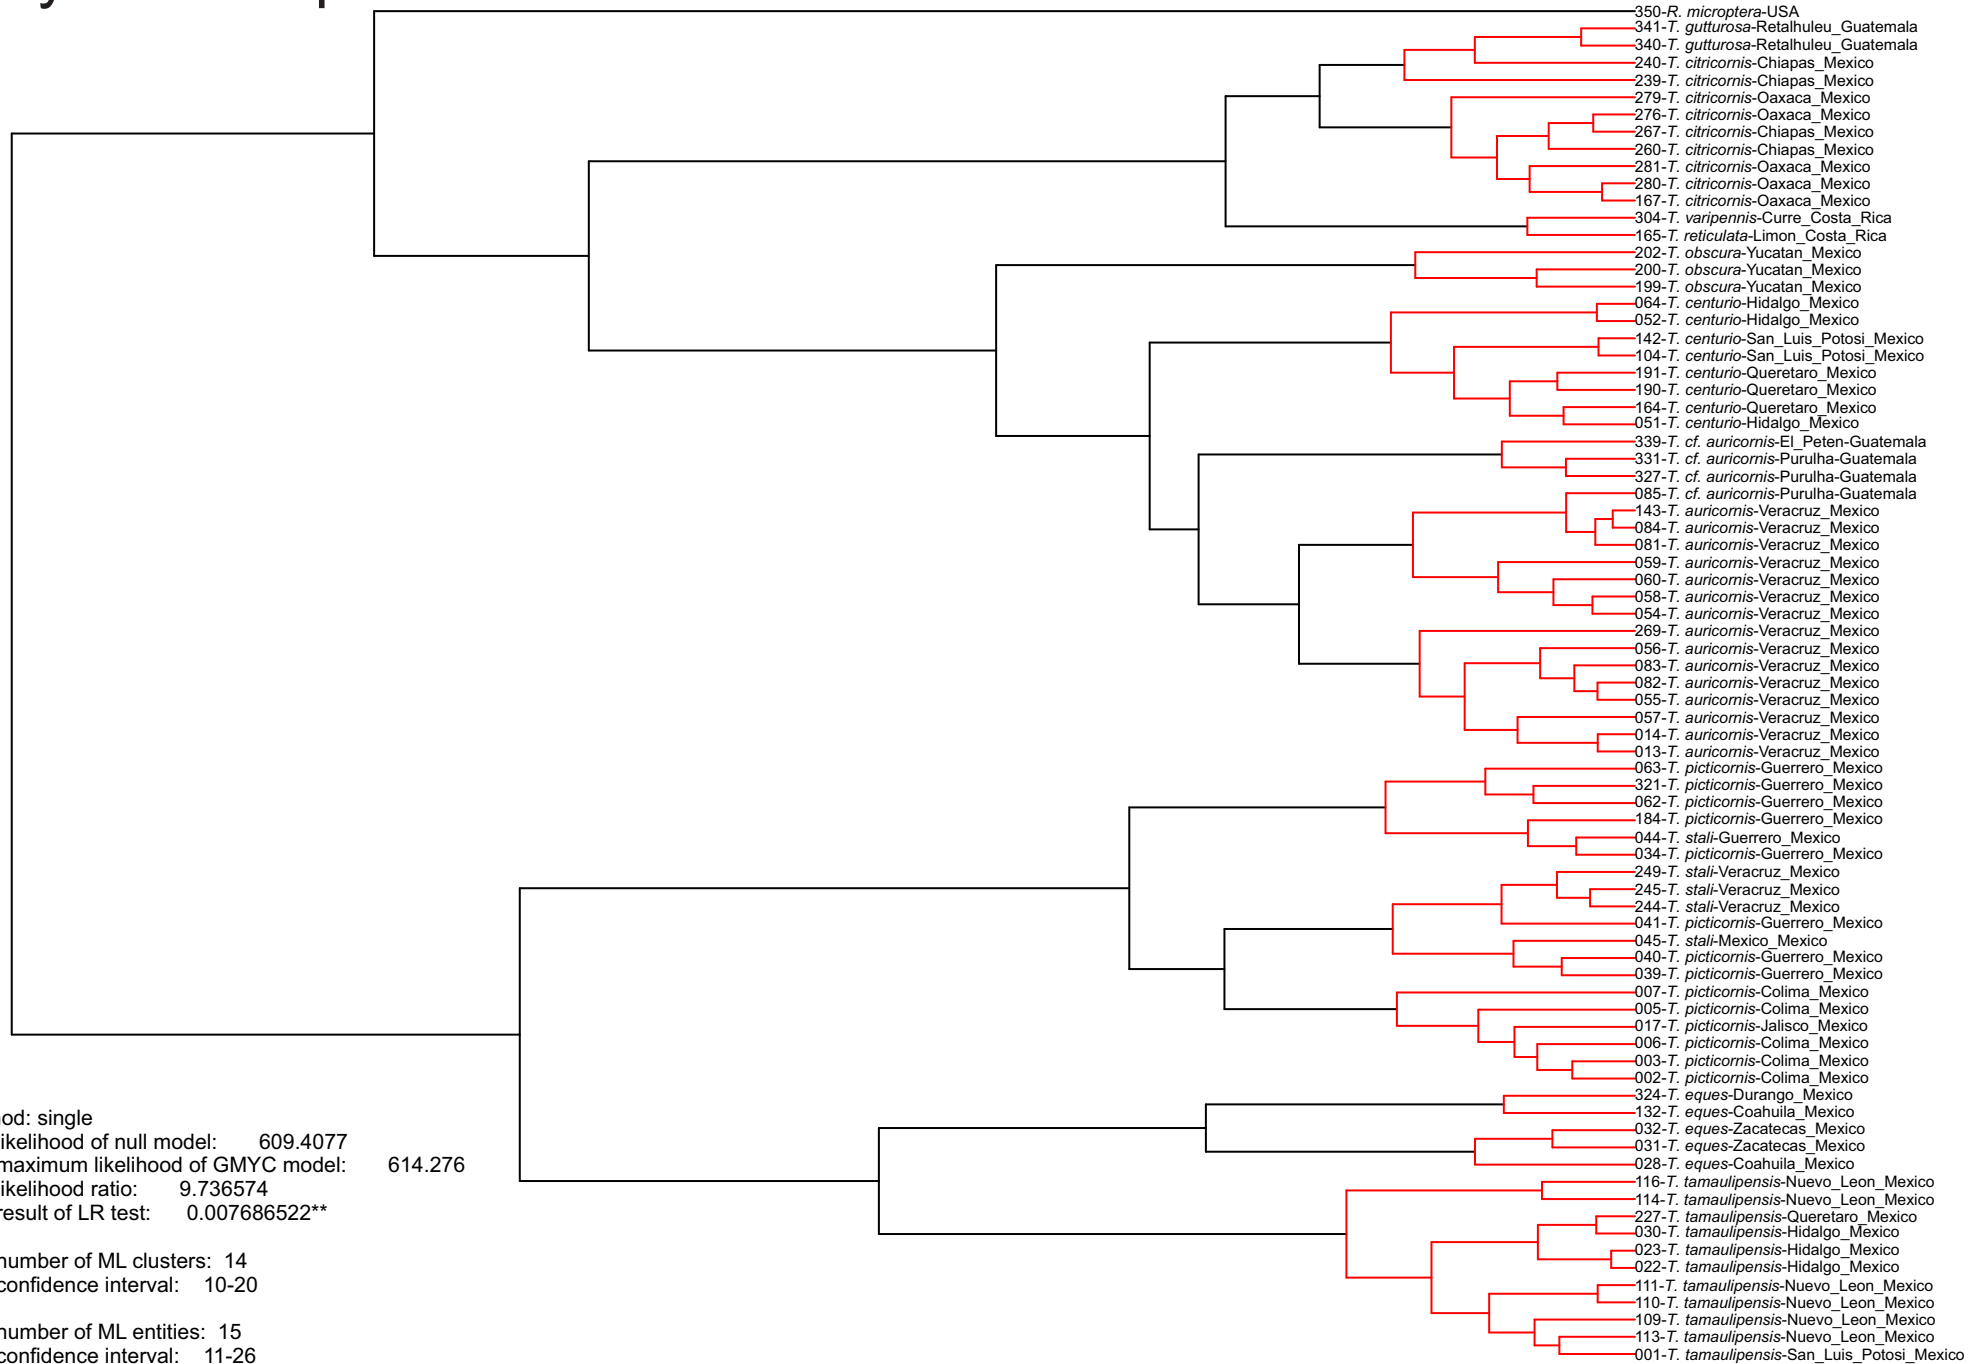

method: single

likelihood of null model: 609.4077

maximum likelihood of GMYC model: 614.276

likelihood ratio: 9.736574

result of LR test: 0.007686522\*\*

number of ML clusters: 14

confidence interval: 10-20

number of ML entities: 15

confidence interval: 11-26

threshold time: -0.006037874

# COI + cyt *b* Yule prior

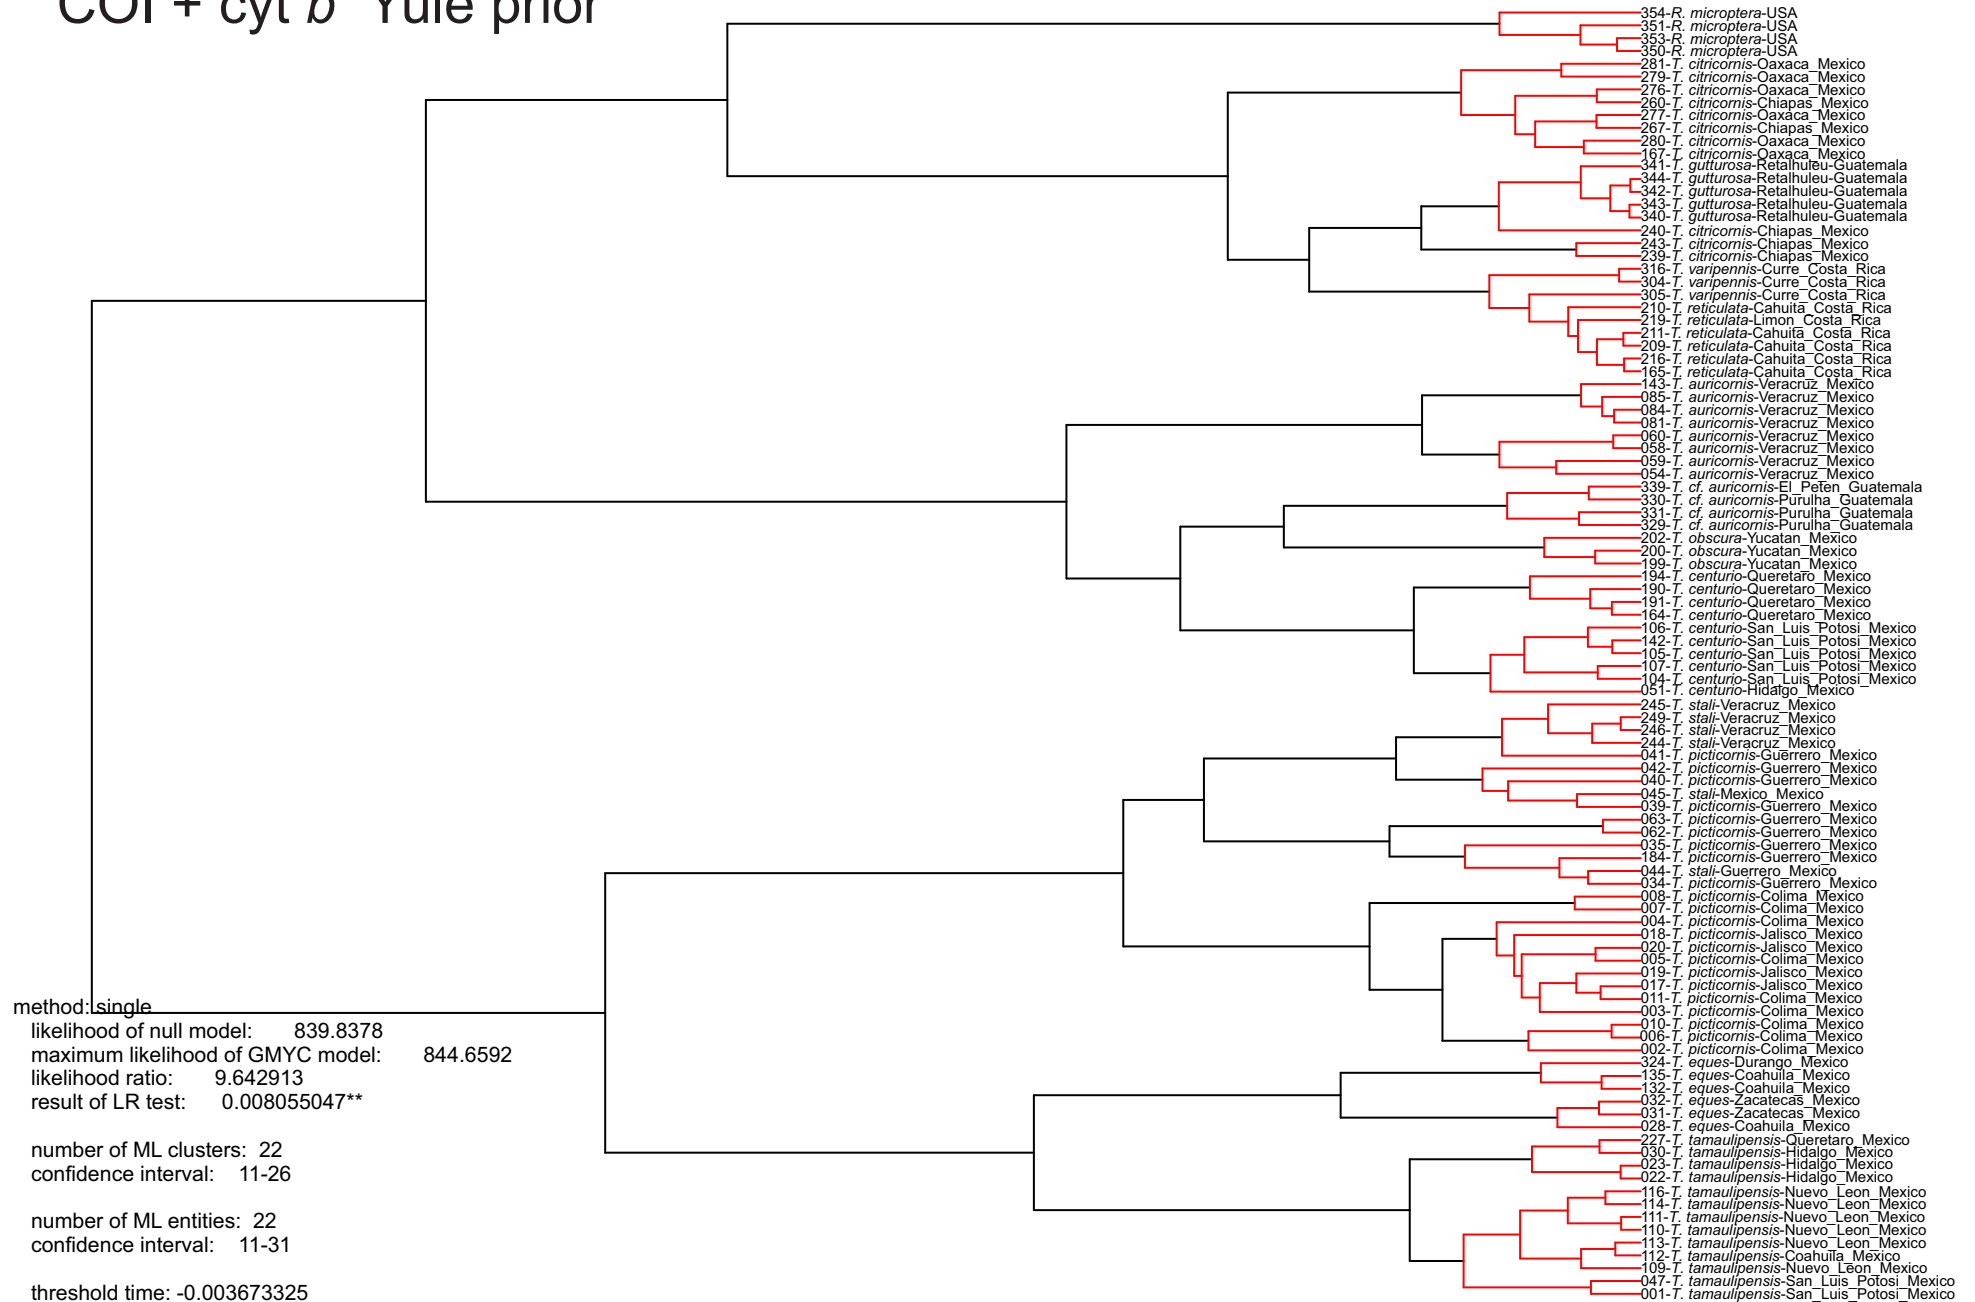

Supplement: Supplementary file 6 [file 1]
