# Supplementary material
Source: publisher figshare collection journal article supplement (https://tandf.figshare.com/articles/dataset/_/4982567)
Supplement: Supplementary file 7 [file 1]

**Supplementary material 8.** Average and range of corrected COI distances using the K2P evolutionary model for the examined specimens of *Taenipoda* and *Romalea microptera*

|                                                       |                             |                             |                             |                             |                             |                             |                             |                             |                             |                             |                             |                             |                             |                             |  |
|-------------------------------------------------------|-----------------------------|-----------------------------|-----------------------------|-----------------------------|-----------------------------|-----------------------------|-----------------------------|-----------------------------|-----------------------------|-----------------------------|-----------------------------|-----------------------------|-----------------------------|-----------------------------|--|
| <b>1. <i>T. picticornis</i> (A)</b>                   | 0.0058<br>(0.0000 - 0.0113) |                             |                             |                             |                             |                             |                             |                             |                             |                             |                             |                             |                             |                             |  |
| <b>2. <i>T. picticornis</i> + <i>T. stali</i> (B)</b> | 0.0232<br>(0.0116 - 0.0314) | 0.0068<br>(0.0000 - 0.0113) |                             |                             |                             |                             |                             |                             |                             |                             |                             |                             |                             |                             |  |
| <b>3. <i>T. picticornis</i> + <i>T. stali</i> (C)</b> | 0.0194<br>(0.0034 - 0.0314) | 0.0195<br>(0.0100 - 0.0262) | 0.0048<br>(0.0000 - 0.0113) |                             |                             |                             |                             |                             |                             |                             |                             |                             |                             |                             |  |
| <b>4. <i>T. tamaulipensis</i></b>                     | 0.0637<br>(0.0423 - 0.0733) | 0.0652<br>(0.0605 - 0.0711) | 0.0608<br>(0.0443 - 0.0695) | 0.0035<br>(0.0000 - 0.0080) |                             |                             |                             |                             |                             |                             |                             |                             |                             |                             |  |
| <b>5. <i>T. eques</i></b>                             | 0.0636<br>(0.0423 - 0.0716) | 0.0658<br>(0.0605 - 0.0712) | 0.0613<br>(0.0461 - 0.0695) | 0.0223<br>(0.0212 - 0.0262) | 0.0038<br>(0.0000 - 0.0081) |                             |                             |                             |                             |                             |                             |                             |                             |                             |  |
| <b>6. <i>T. obscura</i></b>                           | 0.1042<br>(0.0837 - 0.1120) | 0.1043<br>(0.1019 - 0.1058) | 0.1004<br>(0.0785 - 0.1058) | 0.0879<br>(0.0837 - 0.0911) | 0.0865<br>(0.0855 - 0.0874) | 0.0000<br>(0.0000 - 0.0000) |                             |                             |                             |                             |                             |                             |                             |                             |  |
| <b>7. <i>T. cf. auricornis</i></b>                    | 0.1025<br>(0.0790 - 0.1147) | 0.1104<br>(0.1067 - 0.1142) | 0.1110<br>(0.0823 - 0.1171) | 0.0956<br>(0.0903 - 0.0998) | 0.0877<br>(0.0815 - 0.0952) | 0.0118<br>(0.0094 - 0.0166) | 0.0013<br>(0.0000 - 0.0037) |                             |                             |                             |                             |                             |                             |                             |  |
| <b>8. <i>T. auricornis</i></b>                        | 0.0999<br>(0.0761 - 0.1140) | 0.1060<br>(0.1019 - 0.1116) | 0.1003<br>(0.0784 - 0.1096) | 0.0872<br>(0.0818 - 0.0948) | 0.0865<br>(0.0837 - 0.0911) | 0.0164<br>(0.0146 - 0.0179) | 0.0158<br>(0.0095 - 0.0234) | 0.0046<br>(0.0000 - 0.0097) |                             |                             |                             |                             |                             |                             |  |
| <b>9. <i>T. centurio</i></b>                          | 0.1012<br>(0.0742 - 0.1158) | 0.1042<br>(0.0999 - 0.1114) | 0.1029<br>(0.0747 - 0.1153) | 0.0864<br>(0.0804 - 0.0910) | 0.0857<br>(0.0817 - 0.0929) | 0.0262<br>(0.0212 - 0.0313) | 0.0181<br>(0.0132 - 0.0285) | 0.0201<br>(0.0129 - 0.0262) | 0.0044<br>(0.0000 - 0.0113) |                             |                             |                             |                             |                             |  |
| <b>10. <i>T. citricornis</i></b>                      | 0.1024<br>(0.0819 - 0.1142) | 0.0933<br>(0.087 - 0.1003)  | 0.0928<br>(0.0786 - 0.1003) | 0.0929<br>(0.0873 - 0.0987) | 0.0934<br>(0.0910 - 0.0987) | 0.0734<br>(0.0712 - 0.0749) | 0.0805<br>(0.0774 - 0.0841) | 0.0729<br>(0.0676 - 0.0785) | 0.0778<br>(0.0711 - 0.0860) | 0.0068<br>(0.0000 - 0.0146) |                             |                             |                             |                             |  |
| <b>11. <i>T. varipennis</i></b>                       | 0.1088<br>(0.0875 - 0.1190) | 0.0959<br>(0.0906 - 0.1024) | 0.0954<br>(0.0842 - 0.1004) | 0.0940<br>(0.0890 - 0.0988) | 0.0948<br>(0.0928 - 0.0988) | 0.0776<br>(0.0767 - 0.0799) | 0.0839<br>(0.0820 - 0.0880) | 0.0735<br>(0.0694 - 0.0798) | 0.0796<br>(0.0747 - 0.0876) | 0.0111<br>(0.0080 - 0.0152) | 0.0008<br>(0.0000 - 0.0017) |                             |                             |                             |  |
| <b>12. <i>T. reticulata</i></b>                       | 0.1080<br>(0.0857 - 0.1180) | 0.0946<br>(0.0873 - 0.0999) | 0.0946<br>(0.0799 - 0.1001) | 0.0916<br>(0.0839 - 0.1022) | 0.0921<br>(0.0876 - 0.0999) | 0.0789<br>(0.0753 - 0.0841) | 0.0828<br>(0.0780 - 0.0861) | 0.0711<br>(0.0643 - 0.0795) | 0.0773<br>(0.0697 - 0.0910) | 0.0122<br>(0.0081 - 0.0162) | 0.0024<br>(0.0000 - 0.0050) | 0.0004<br>(0.0000 - 0.0016) |                             |                             |  |
| <b>13. <i>T. gutturosa</i></b>                        | 0.1019<br>(0.0828 - 0.1101) | 0.0939<br>(0.0885 - 0.0976) | 0.0920<br>(0.0776 - 0.0956) | 0.0942<br>(0.0887 - 0.0979) | 0.0950<br>(0.0926 - 0.0979) | 0.0771<br>(0.0770 - 0.0776) | 0.0821<br>(0.0795 - 0.0831) | 0.0744<br>(0.0698 - 0.0788) | 0.0808<br>(0.0755 - 0.0867) | 0.0079<br>(0.0034 - 0.0154) | 0.0125<br>(0.0118 - 0.0136) | 0.0135<br>(0.0119 - 0.0153) | 0.0000<br>(0.0000 - 0.0000) |                             |  |
| <b>14. <i>R. microptera</i></b>                       | 0.0966<br>(0.0741 - 0.1058) | 0.0923<br>(0.0896 - 0.0954) | 0.0926<br>(0.0748 - 0.0993) | 0.0895<br>(0.0861 - 0.0958) | 0.0883<br>(0.0841 - 0.0939) | 0.0834<br>(0.0826 - 0.0846) | 0.0795<br>(0.0777 - 0.0820) | 0.0747<br>(0.0711 - 0.0788) | 0.0758<br>(0.0710 - 0.0825) | 0.0705<br>(0.0674 - 0.0732) | 0.0745<br>(0.0730 - 0.0768) | 0.0714<br>(0.0657 - 0.0731) | 0.0716<br>(0.0696 - 0.0730) | 0.0027<br>(0.0000 - 0.0067) |  |
|                                                       | 1                           | 2                           | 3                           | 4                           | 5                           | 6                           | 7                           | 8                           | 9                           | 10                          | 11                          | 12                          | 13                          | 14                          |  |
