# Supplementary material
Source: publisher figshare collection journal article supplement (https://tandf.figshare.com/articles/dataset/_/4982567)
Supplement: Supplementary file 8 [file 1]

**Supplementary Material 5.** Size (bp), substitution models, and informative sites of the datasets of COI, *cyt b*, 28S and H3.

| Genetic marker      | Size (bp) | Substitution model | Variable sites | Informative sites | % Informative sites |
|---------------------|-----------|--------------------|----------------|-------------------|---------------------|
| <b>COI</b>          | 626       | -                  | 201            | 168               | 26.83               |
| COI 1pos            | 209       | SYM+G              | 42             | 33                | 15.78               |
| COI 2pos            | 209       | F81+G              | 9              | 4                 | 1.91                |
| COI 3pos            | 208       | HKY+G              | 150            | 131               | 62.98               |
| <b><i>cyt b</i></b> | 423       | -                  | 166            | 131               | 30.96               |
| <i>cyt b</i> 1pos   | 141       | GTR+I              | 48             | 38                | 26.95               |
| <i>cyt b</i> 2pos   | 141       | GTR+I              | 23             | 12                | 8.50                |
| <i>cytb</i> 3pos    | 141       | HKY+G              | 95             | 81                | 57.44               |
| <b>H3</b>           | 314       | -                  | 29             | 15                | 4.77                |
| H3 1pos             | 105       | JC                 | 3              | 2                 | 1.90                |
| H3 2pos             | 105       | JC                 | 1              | 0                 | 0.00                |
| H3 2pos             | 104       | HKY                | 25             | 13                | 12.50               |
| <b>28S</b>          | 652       | HKY                | 65             | 25                | 3.83                |
